# Supplementary material for: Sewage loading and microbial risk in urban waters of the Great Lakes
Source: PubMed Central journal article supplement (PMC6211557; doi:10.1525/elementa.301), 2018-06-20

Figure S3. Fecal indicator bacteria at Milwaukee River at the Mouth and stream discharge at four Milwaukee River Watershed sites. [Menomonee River, Menomonee River at Wauwatosa; Kinnickinnic River, Kinnickinnic River at S. 11th Street at Milwaukee; lowess, lowess smoothing curve from 5 minute discharge data within a seiche–effected river channel; Lachno2, Lachnospiraceae human marker; Ruminant, *Bacteroides* Ruminant marker].

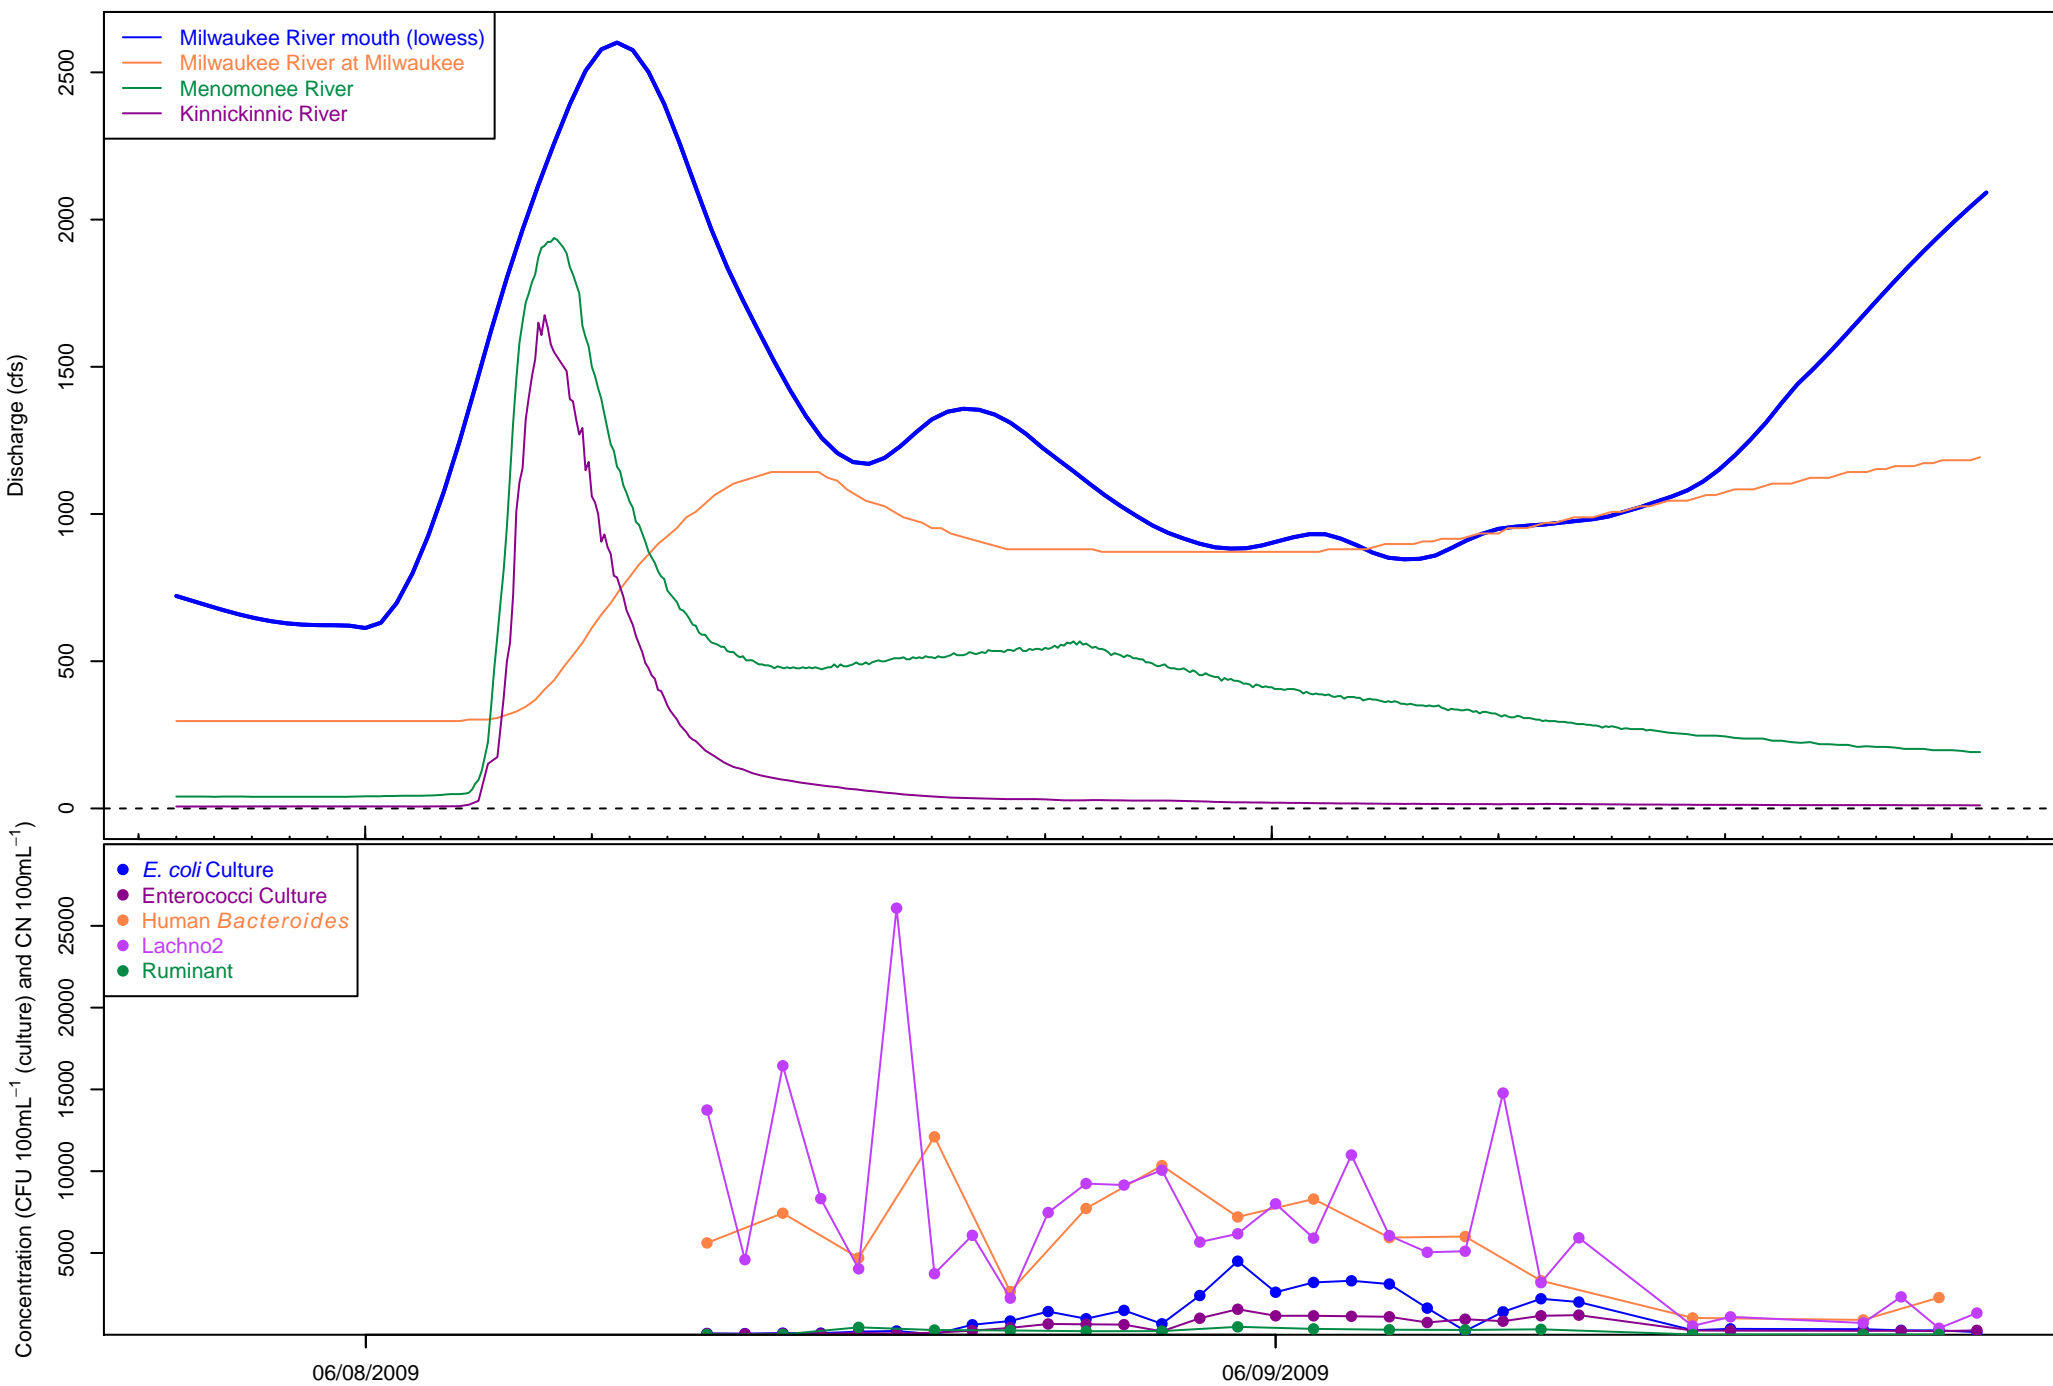

Figure S4. Fecal indicator bacteria at Milwaukee River at the Mouth and stream discharge at four Milwaukee River Watershed sites. [Menomonee River, Menomonee River at Wauwatosa; Kinnickinnic River, Kinnickinnic River at S. 11th Street at Milwaukee; lowess, lowess smoothing curve from 5 minute discharge data within a seiche–effected river channel; Lachno2, Lachnospiraceae human marker]

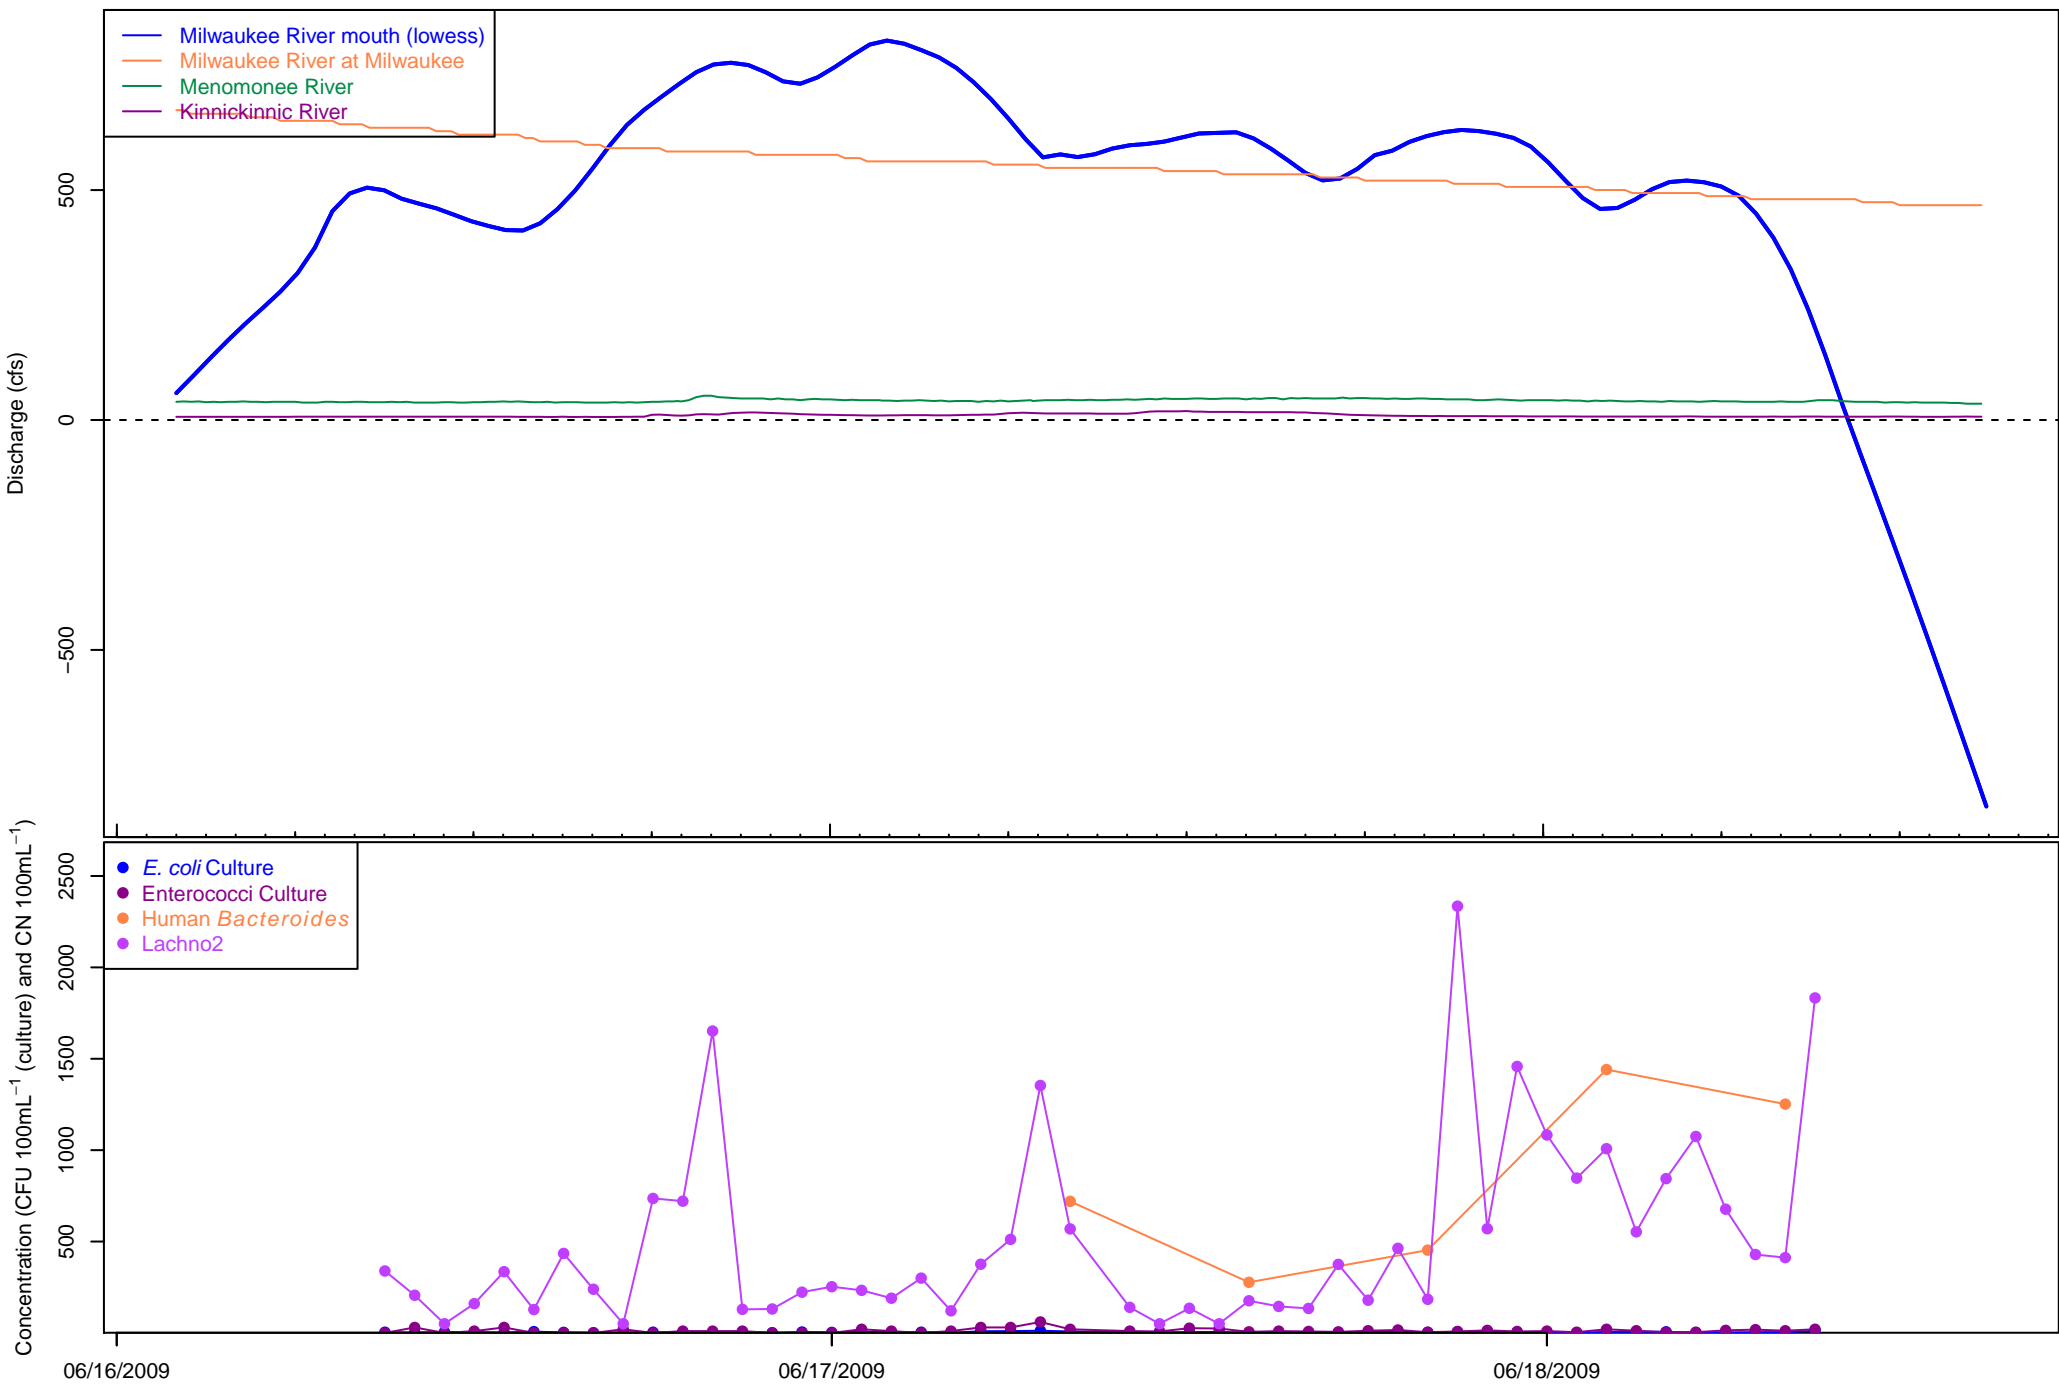

Figure S5. Fecal indicator bacteria at Milwaukee River at the Mouth and stream discharge at four Milwaukee River Watershed sites. [Menomonee River, Menomonee River at Wauwatosa; Kinnickinnic River, Kinnickinnic River at S. 11th Street at Milwaukee; lowess, lowess smoothing curve from 5 minute discharge data within a seiche–effected river channel; Lachno2, Lachnospiraceae human marker]

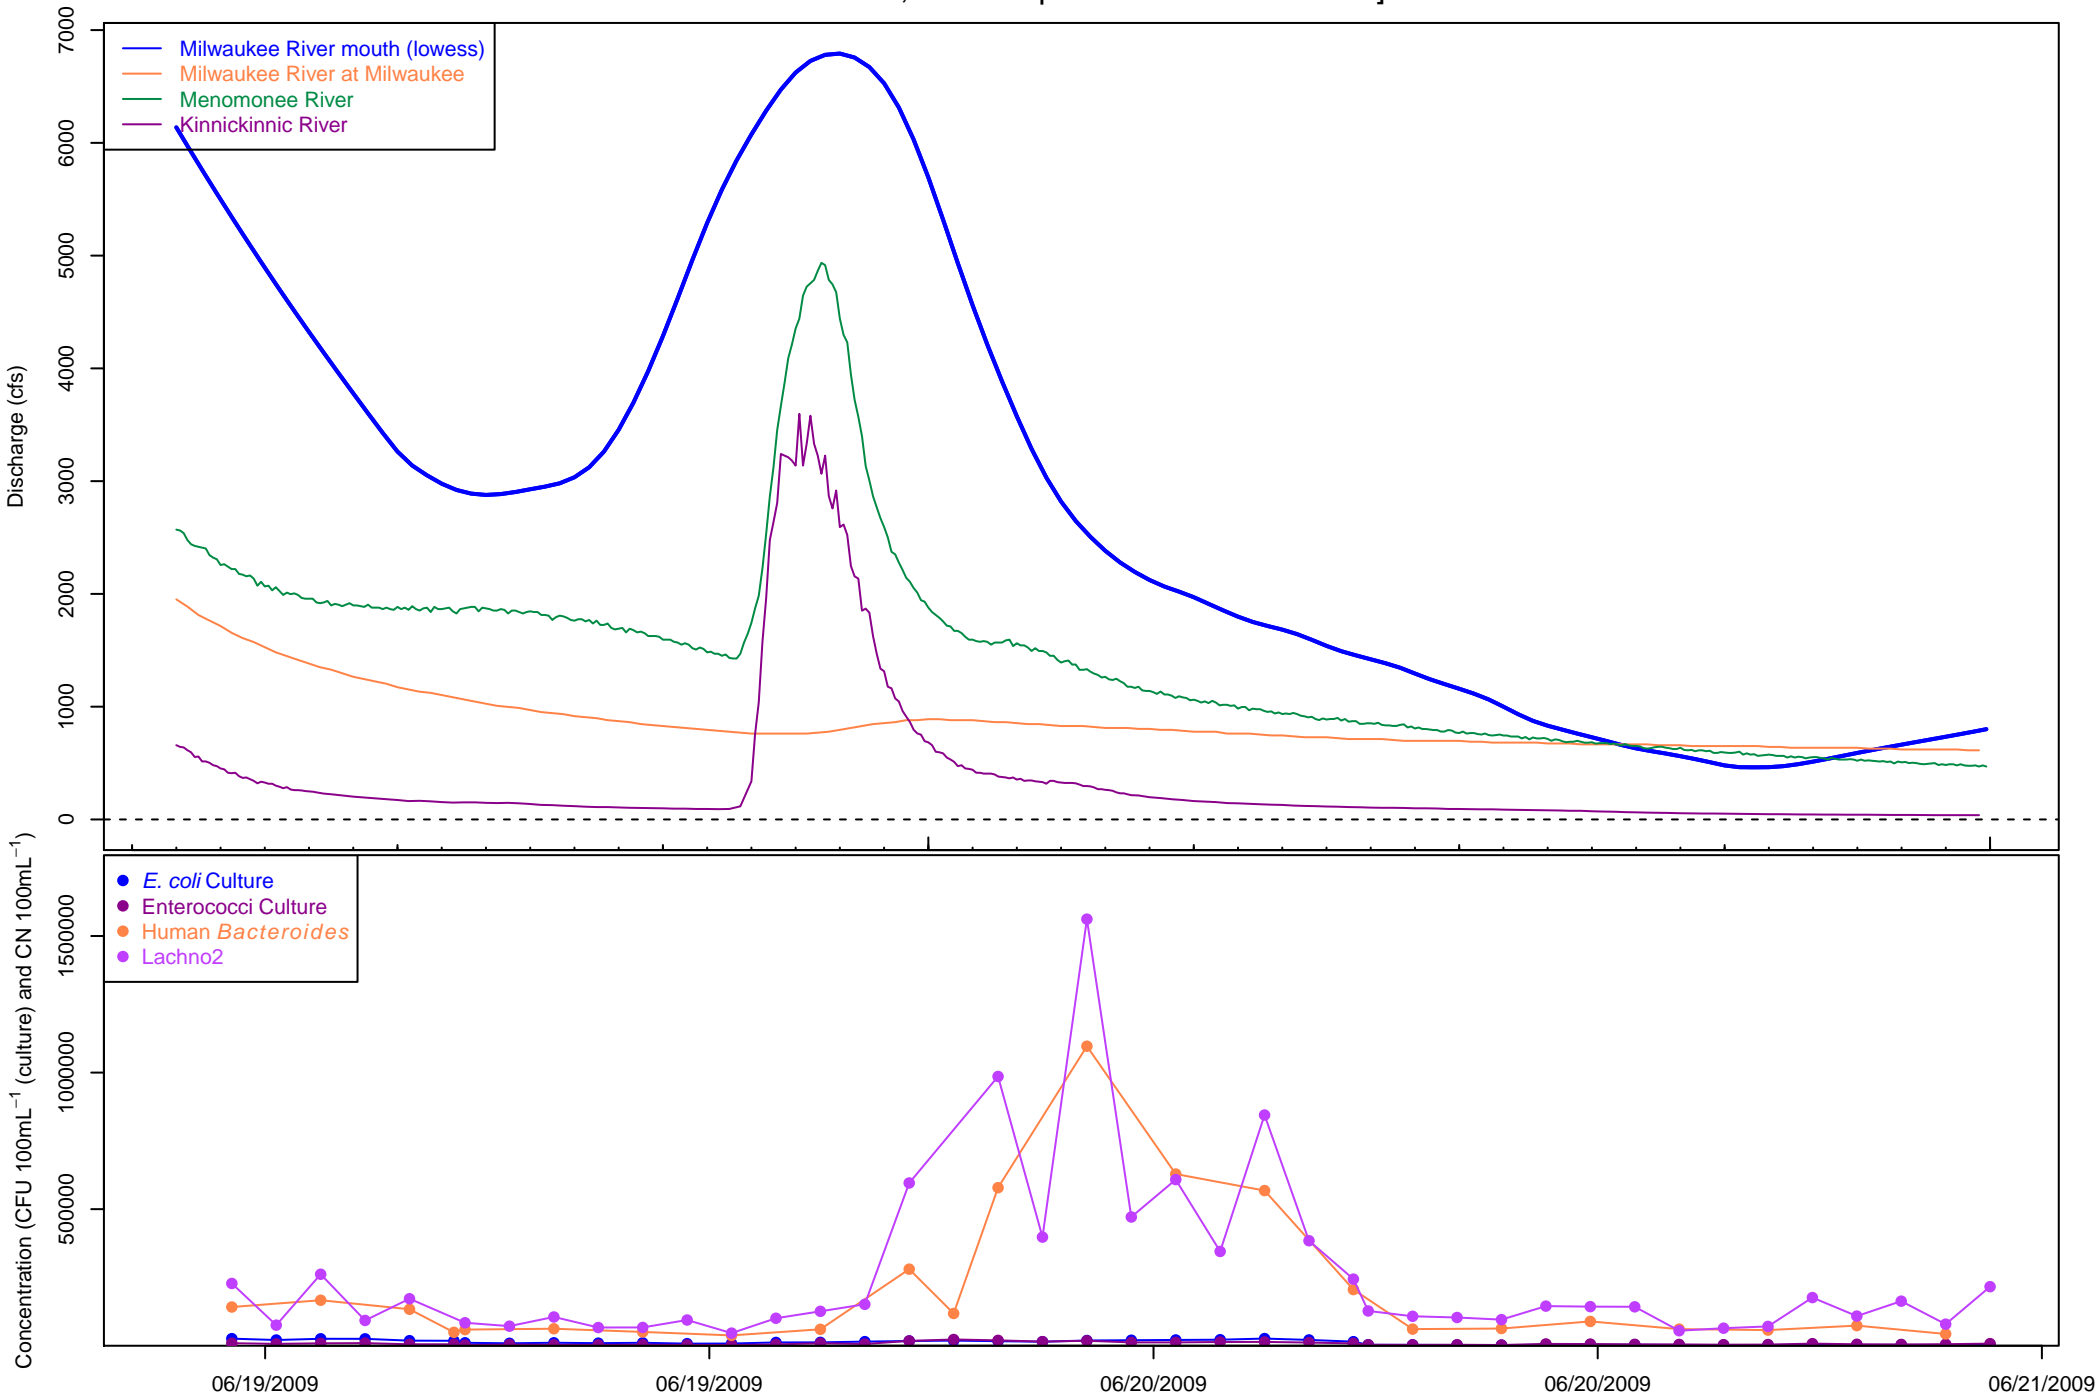

Figure S6. Fecal indicator bacteria at Milwaukee River at the Mouth and stream discharge at four Milwaukee River Watershed sites. [Menomonee River, Menomonee River at Wauwatosa; Kinnickinnic River, Kinnickinnic River at S. 11th Street at Milwaukee; lowess, lowess smoothing curve from 5 minute discharge data within a seiche–effected river channel; Lachno2, Lachnospiraceae human marker; Ruminant, *Bacteroides* Ruminant marker].

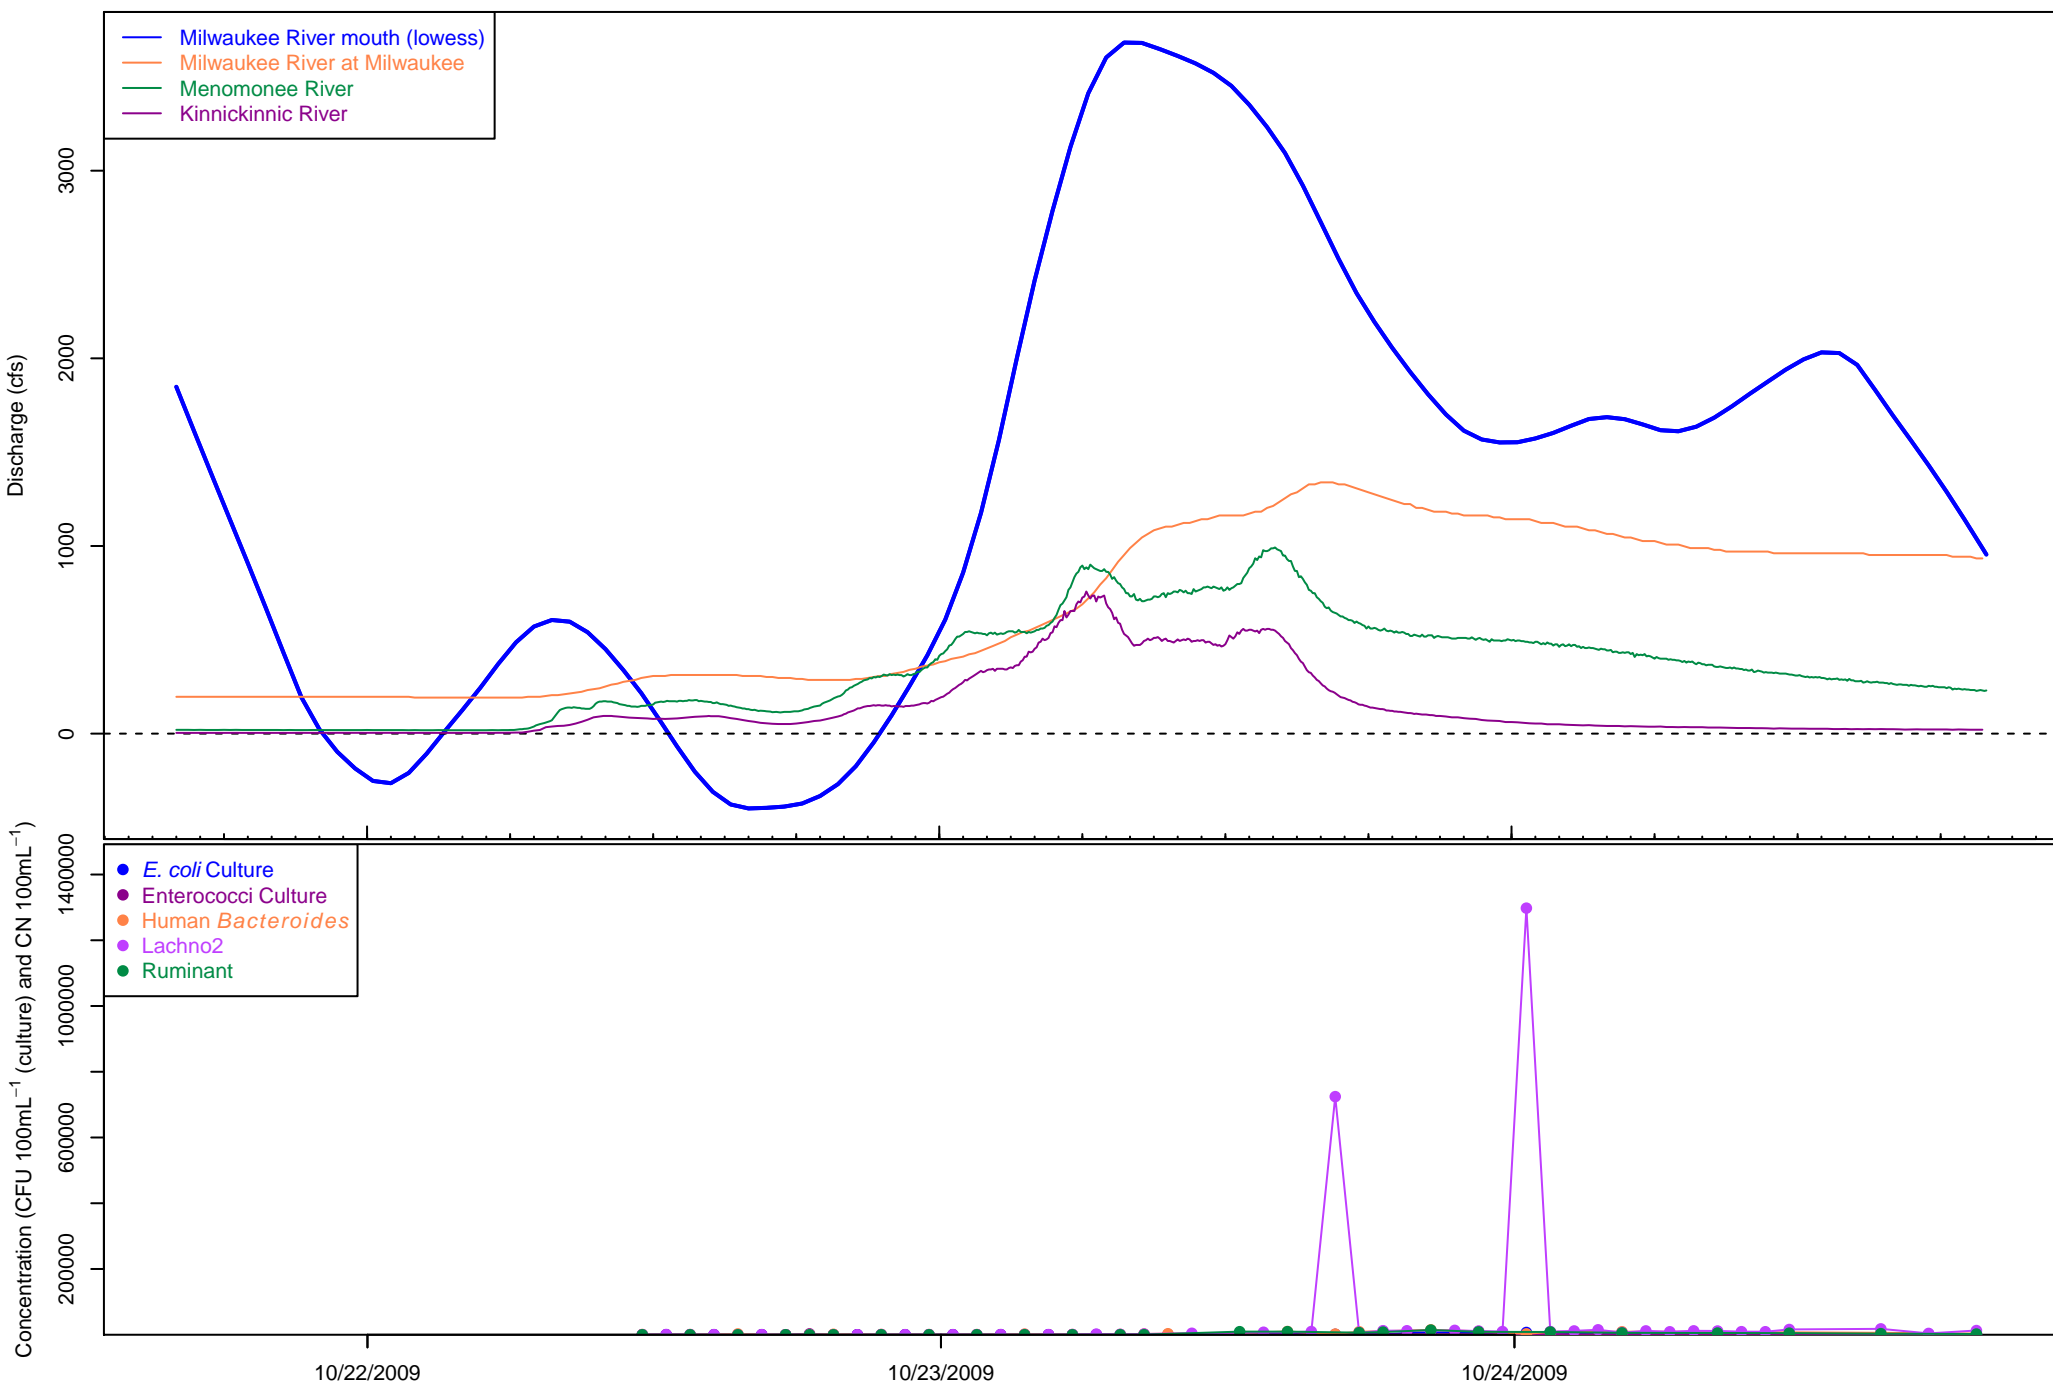

Figure S7. Fecal indicator bacteria at Milwaukee River at the Mouth and stream discharge at four Milwaukee River Watershed sites. [Menomonee River, Menomonee River at Wauwatosa; Kinnickinnic River, Kinnickinnic River at S. 11th Street at Milwaukee; lowess, lowess smoothing curve from 5 minute discharge data within a seiche–effected river channel; Lachno2, Lachnospiraceae human marker]

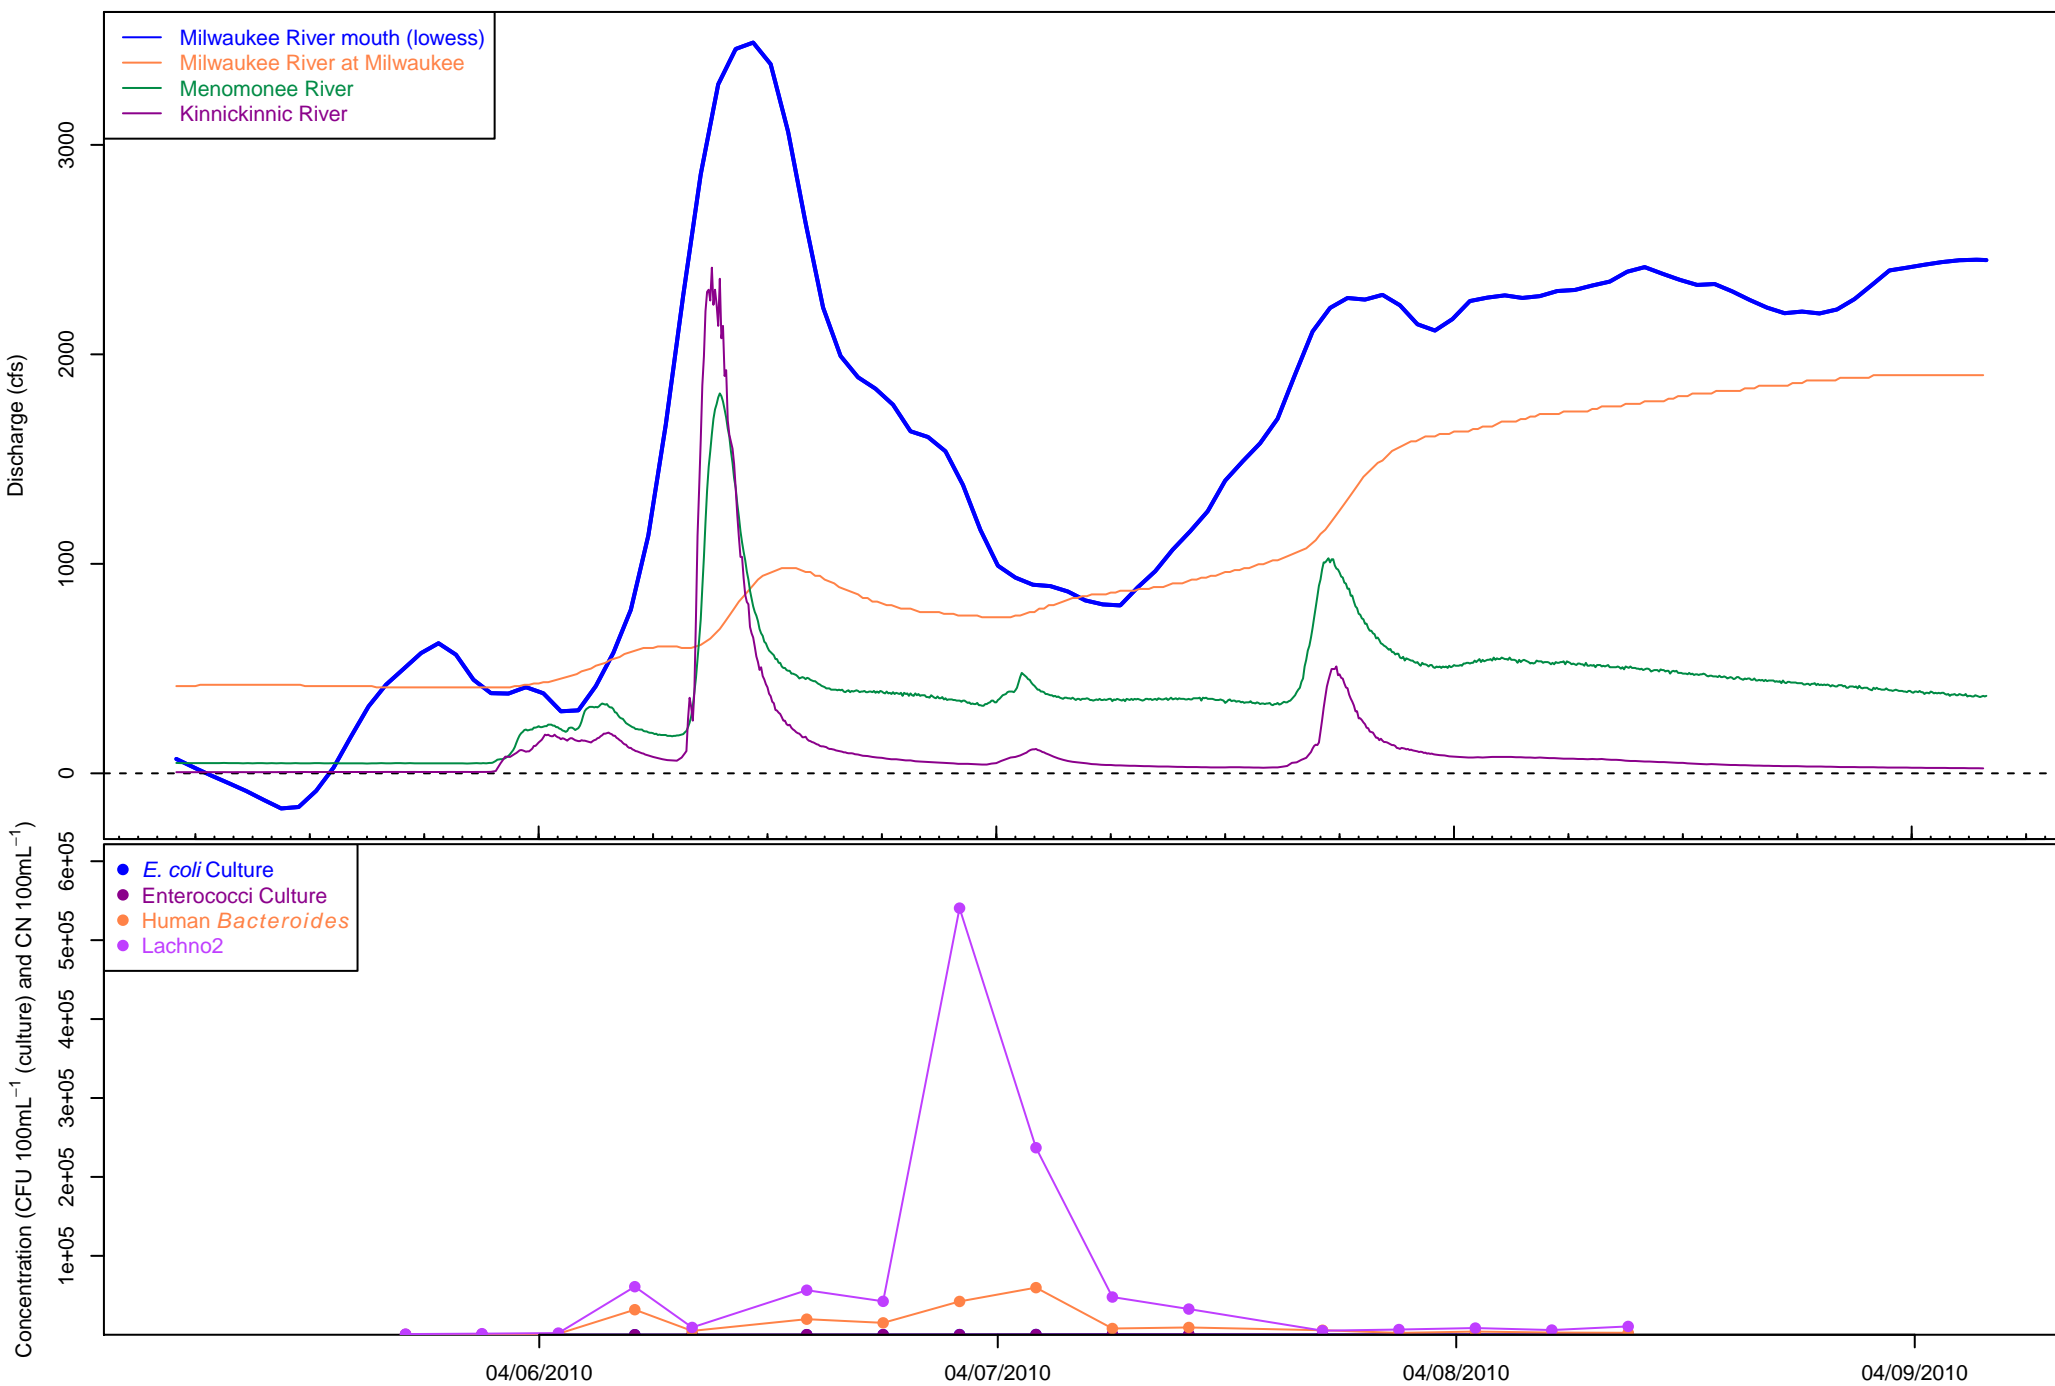

Figure S8. Fecal indicator bacteria at Milwaukee River at the Mouth and stream discharge at four Milwaukee River Watershed sites. [Menomonee River, Menomonee River at Wauwatosa; Kinnickinnic River, Kinnickinnic River at S. 11th Street at Milwaukee; lowess, lowess smoothing curve from 5 minute discharge data within a seiche-affected river channel; Lachno2, Lachnospiraceae human marker]

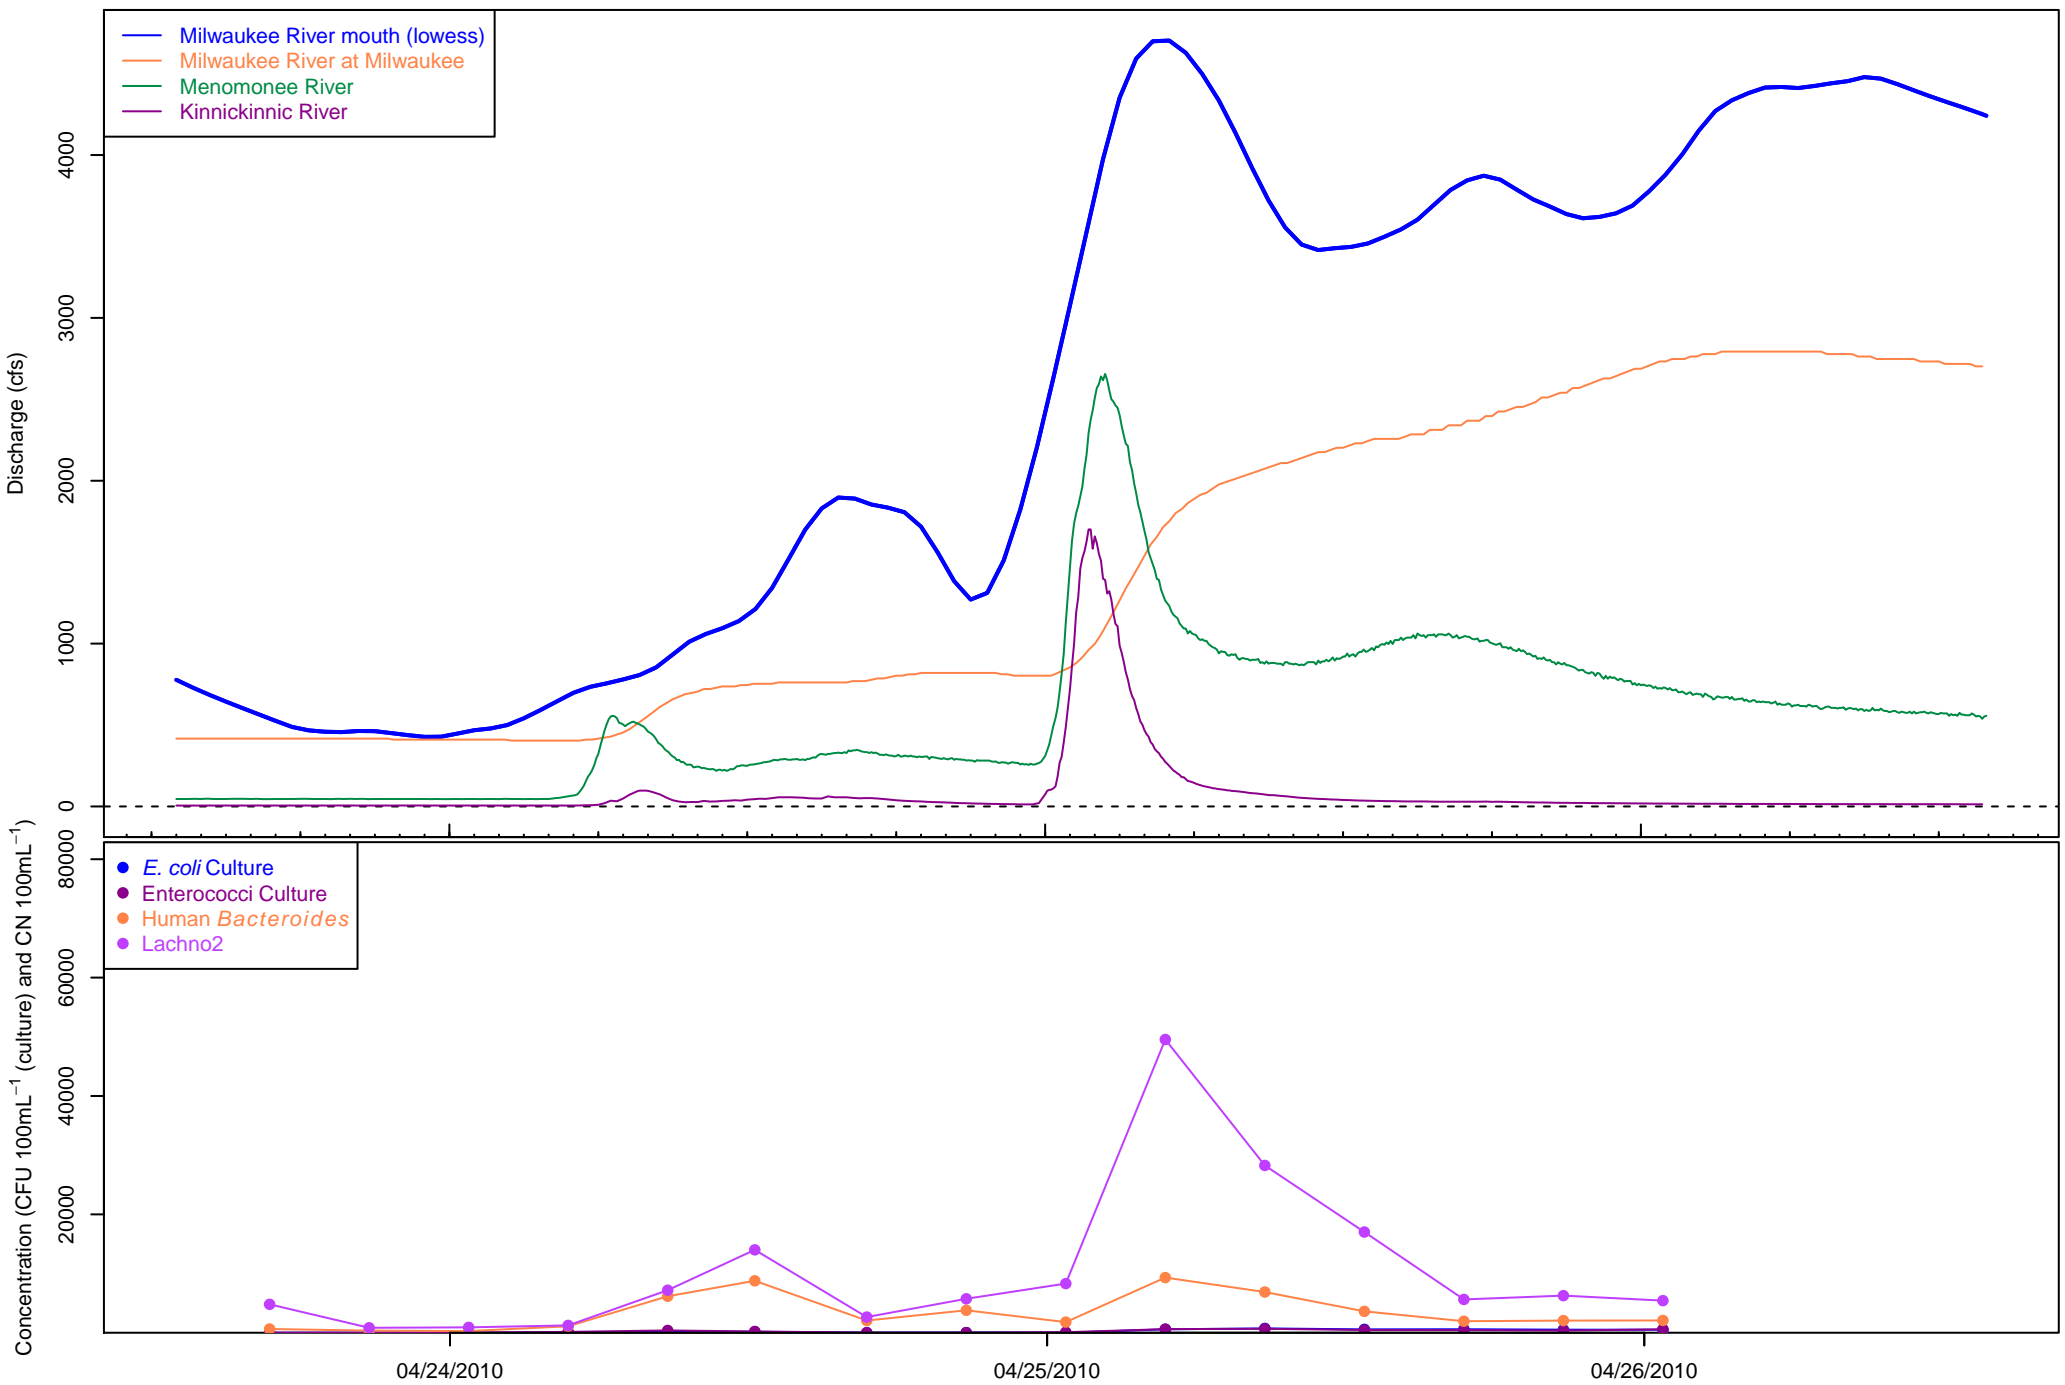

Figure S9. Fecal indicator bacteria at Milwaukee River at the Mouth and stream discharge at four Milwaukee River Watershed sites. [Menomonee River, Menomonee River at Wauwatosa; Kinnickinnic River, Kinnickinnic River at S. 11th Street at Milwaukee; lowess, lowess smoothing curve from 5 minute discharge data within a seiche-affected river channel; Lachno2, Lachnospiraceae human marker; Ruminant, *Bacteroides* Ruminant marker].

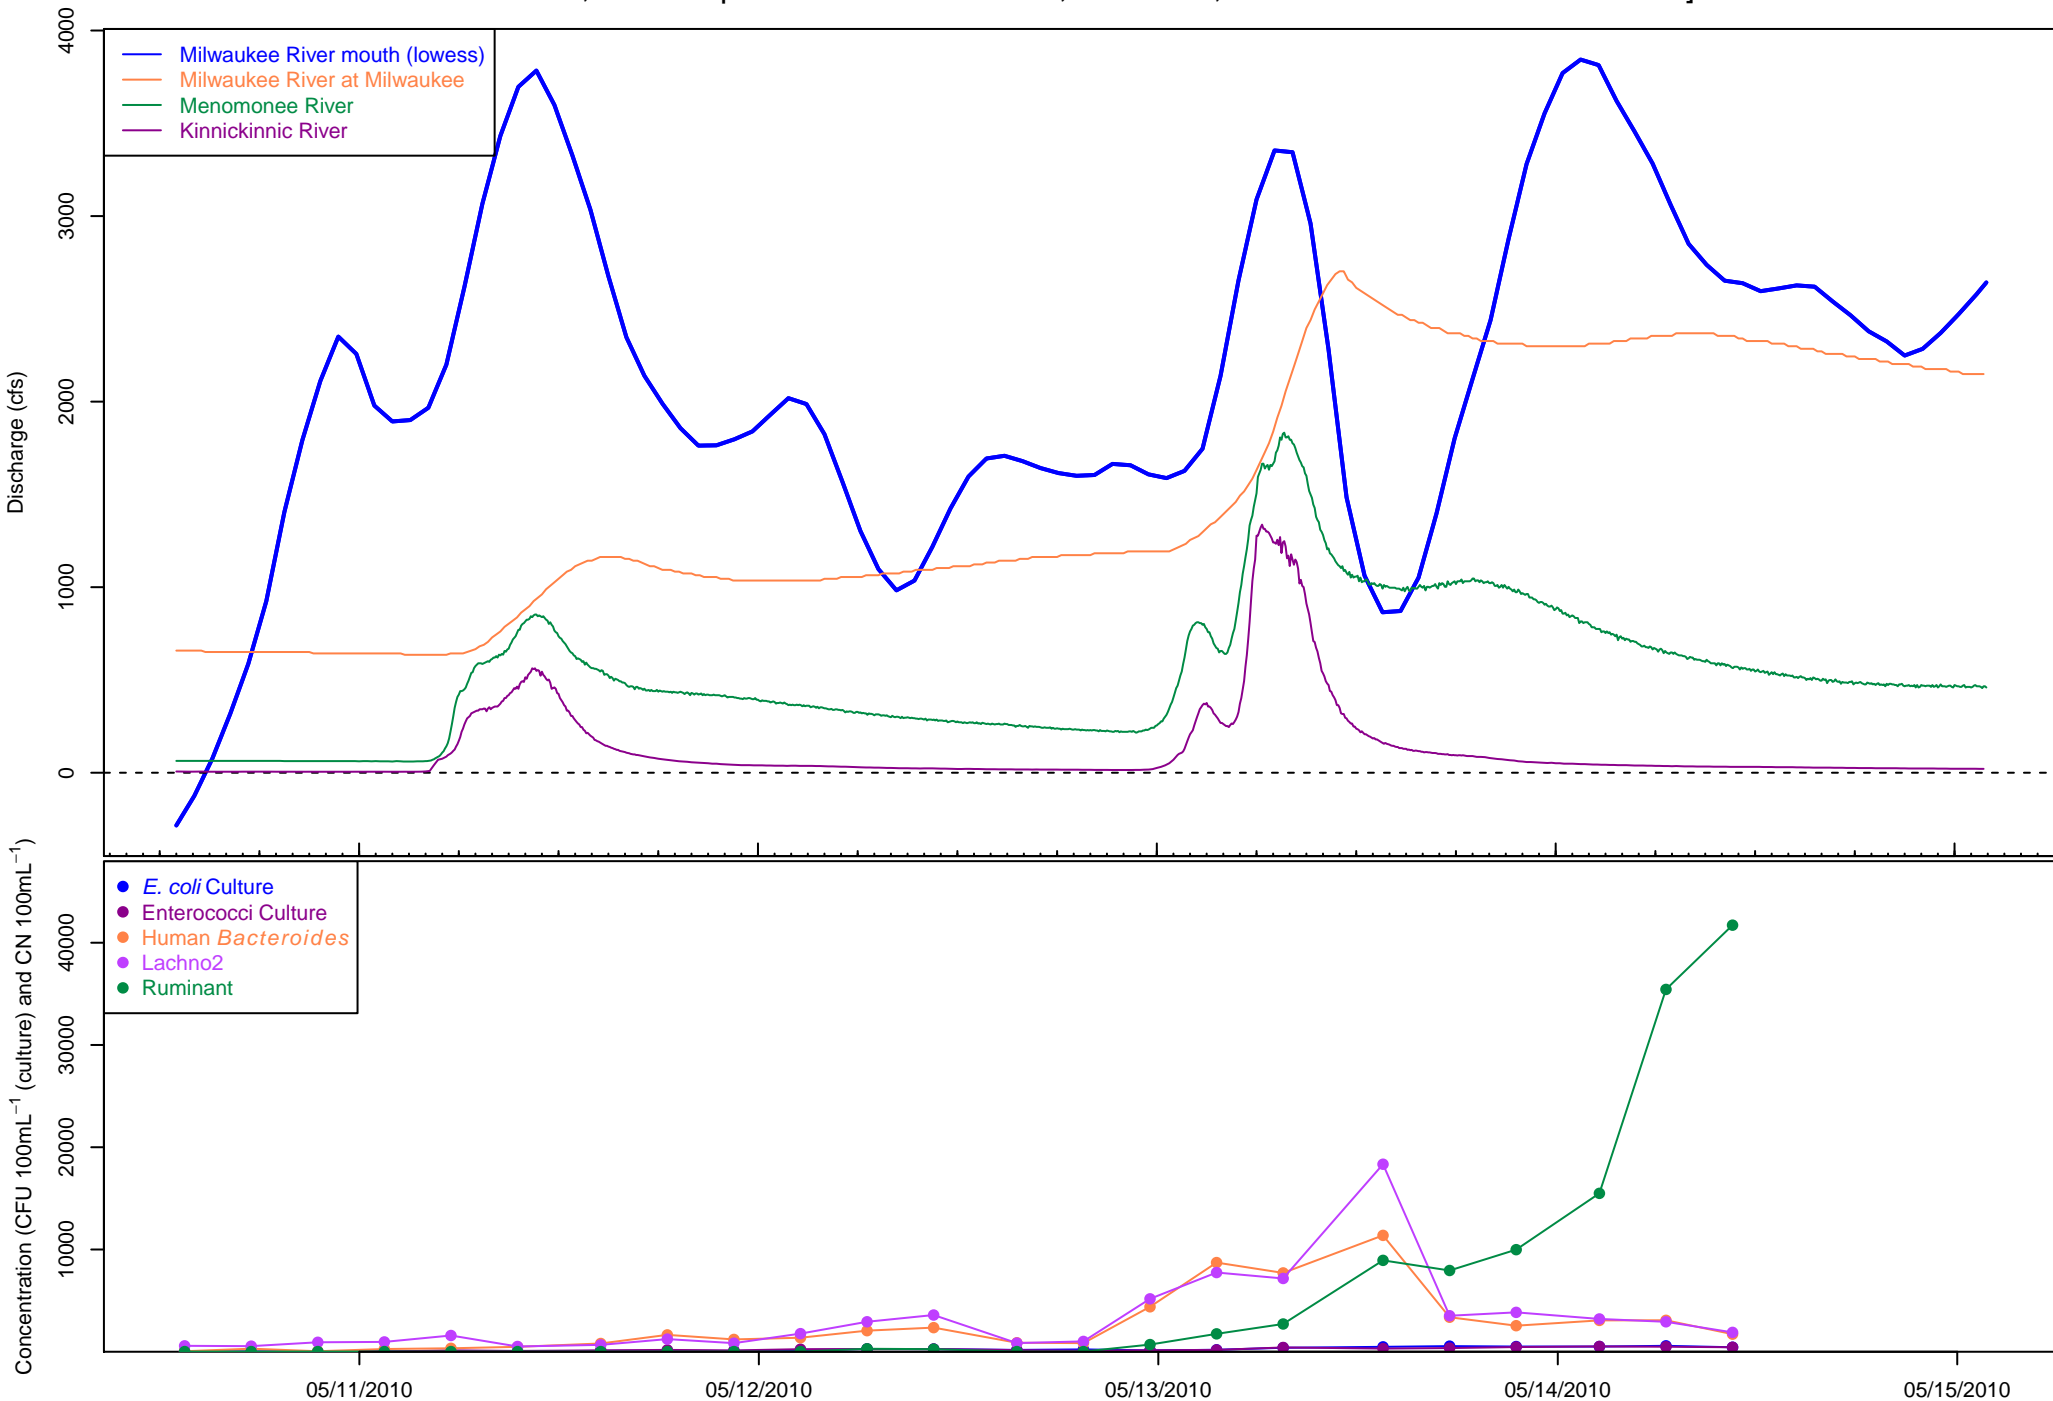

Figure S10. Fecal indicator bacteria at Milwaukee River at the Mouth and stream discharge at four Milwaukee River Watershed sites. [Menomonee River, Menomonee River at Wauwatosa; Kinnickinnic River, Kinnickinnic River at S. 11th Street at Milwaukee; lowess, lowess smoothing curve from 5 minute discharge data within a seiche-affected river channel; Lachno2, Lachnospiraceae human marker]

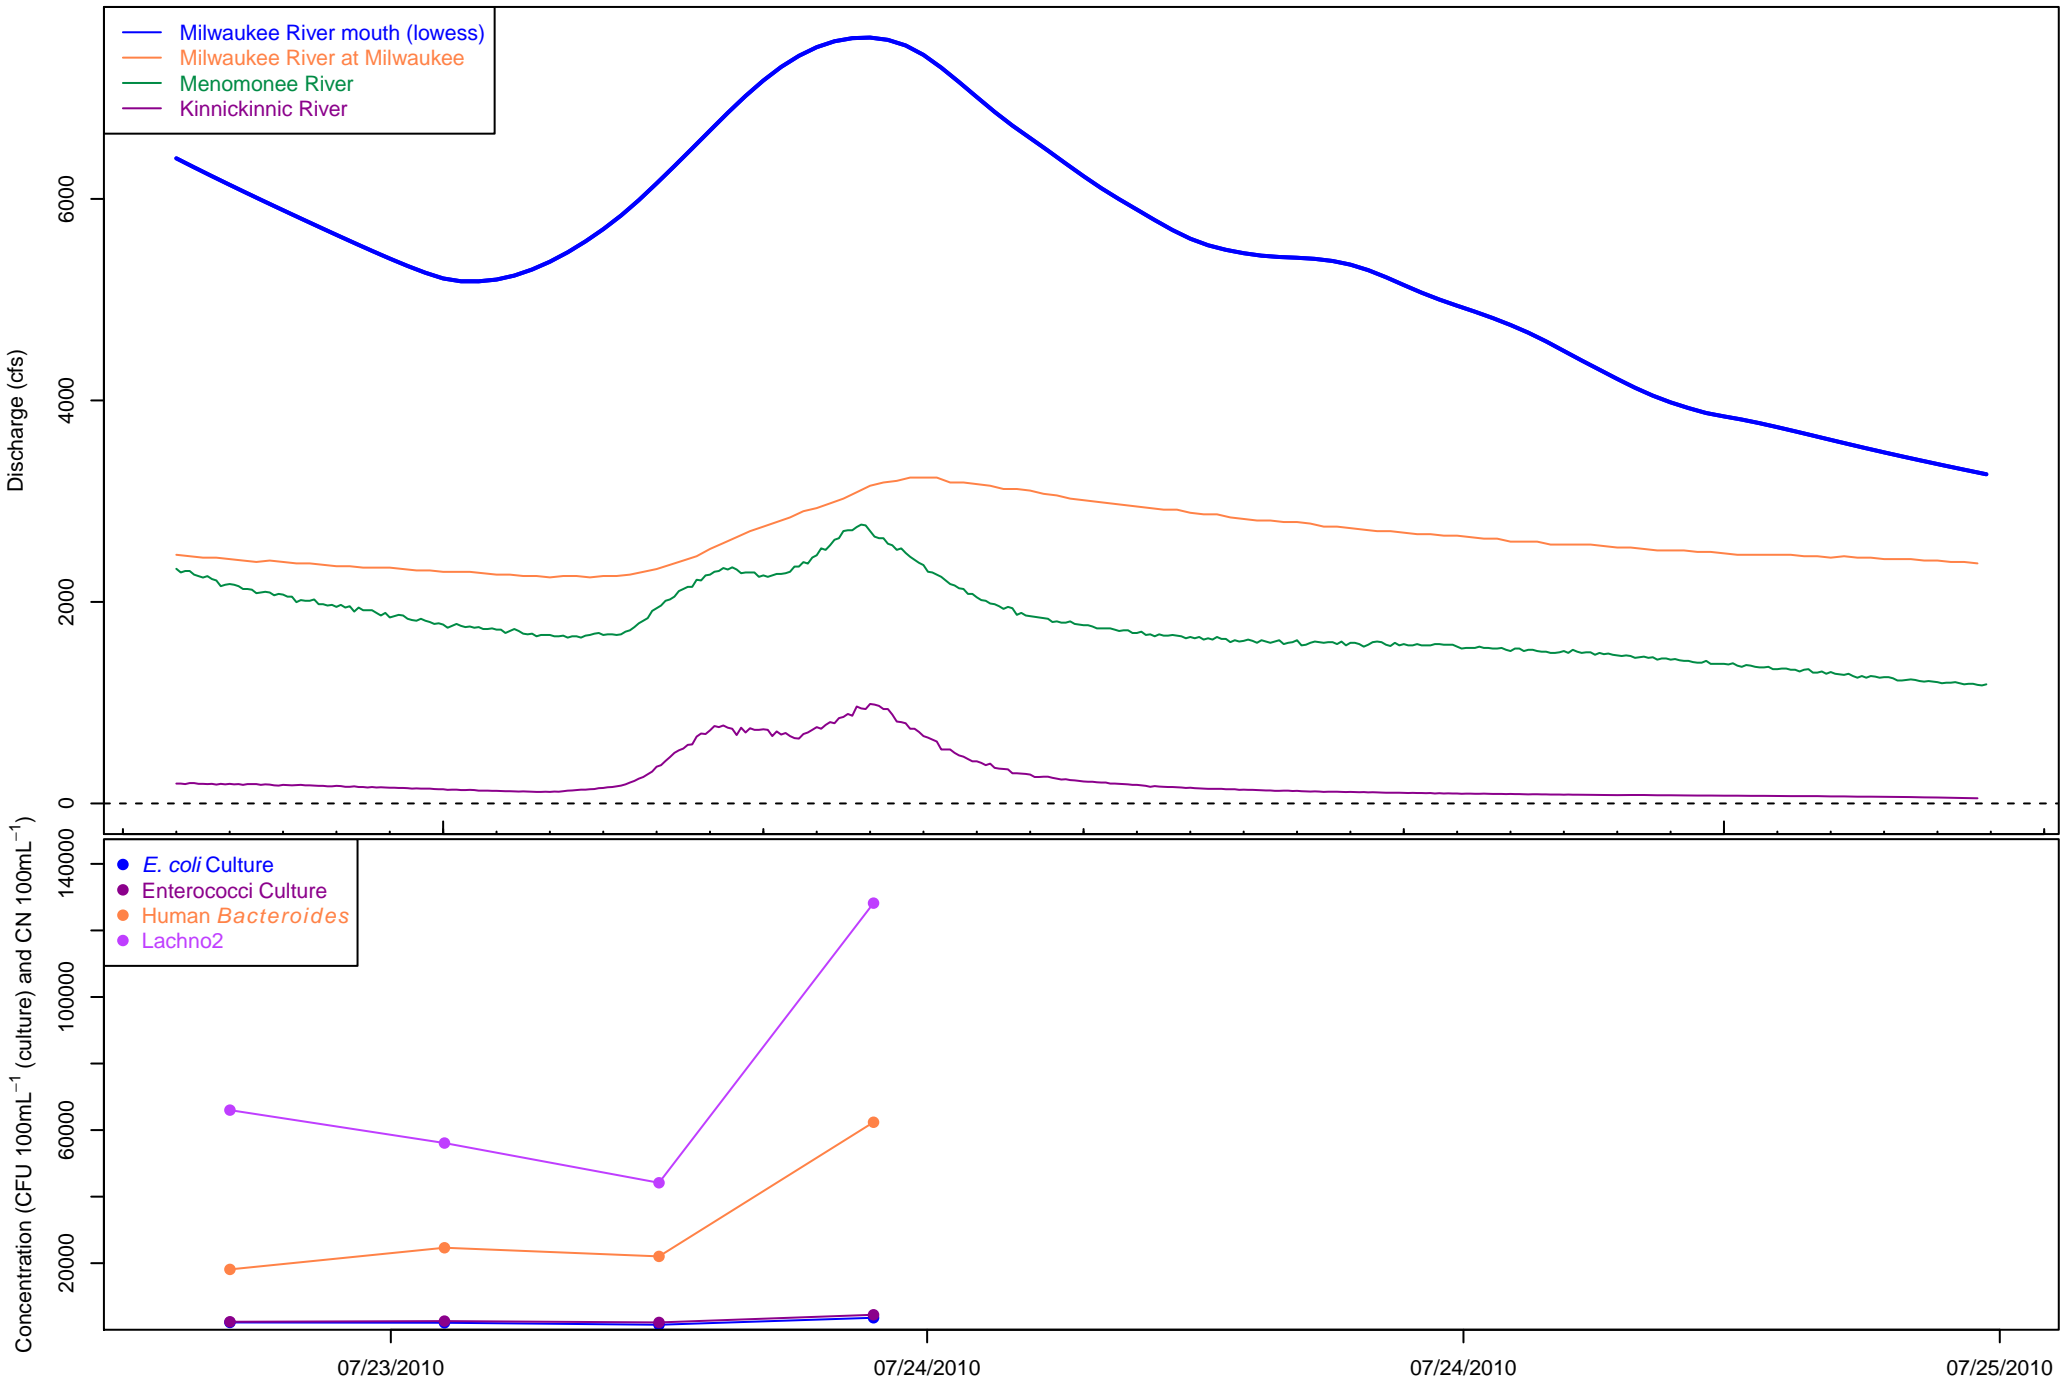



Figure S11. Fecal indicator bacteria at Milwaukee River at the Mouth and stream discharge at four Milwaukee River Watershed sites. [Menomonee River, Menomonee River at Wauwatosa; Kinnickinnic River, Kinnickinnic River at S. 11th Street at Milwaukee; lowess, lowess smoothing curve from 5 minute discharge data within a seiche-affected river channel; Lachno2, Lachnospiraceae human marker]

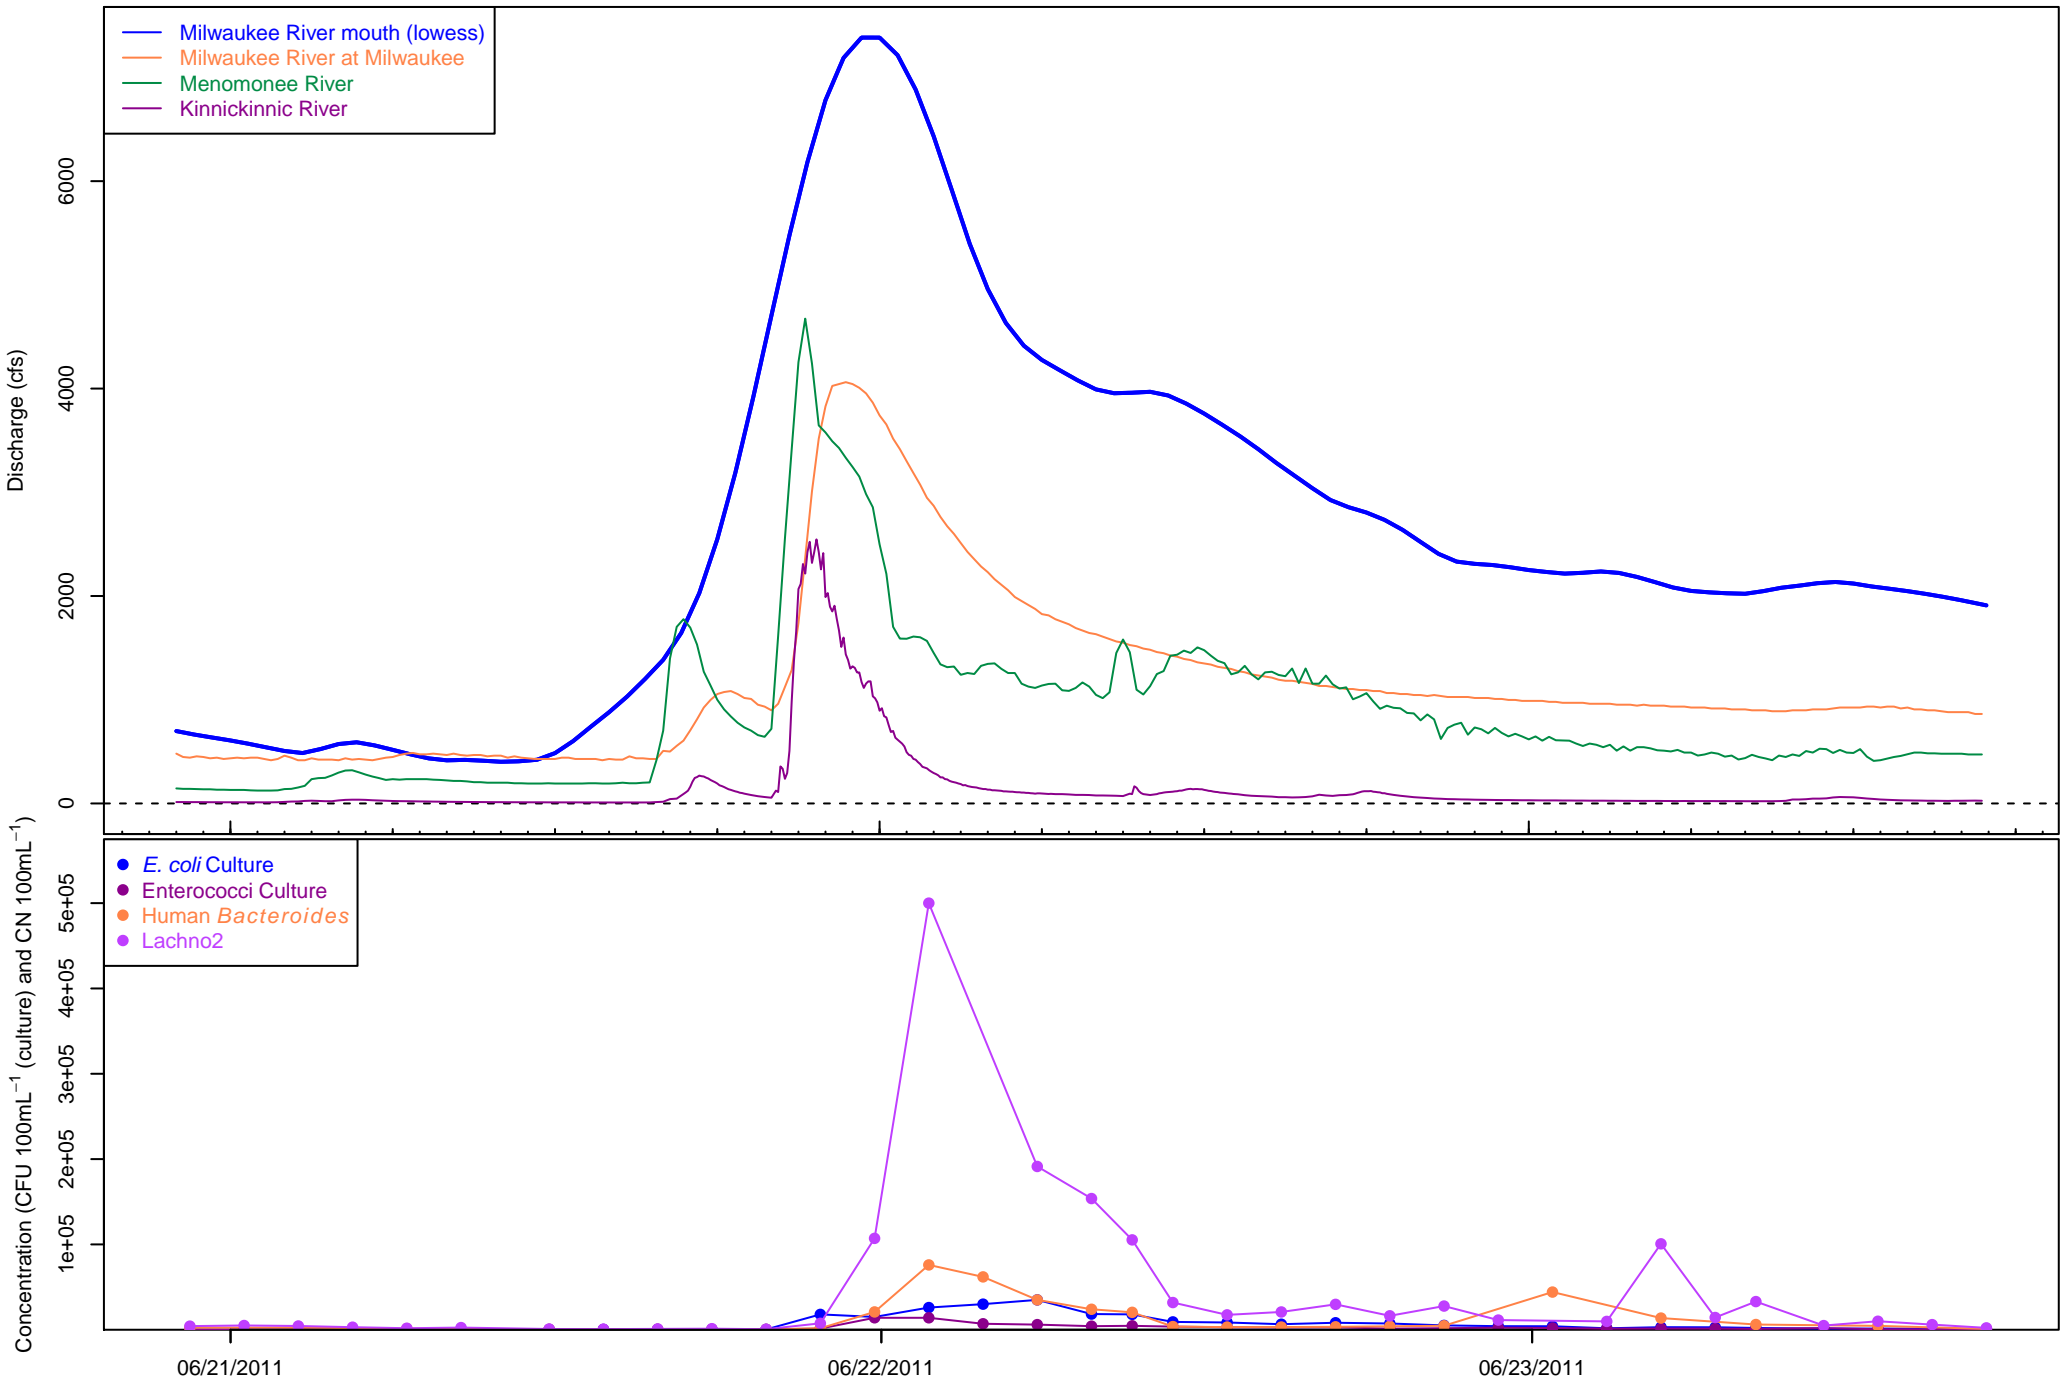

Figure S12. Fecal indicator bacteria at Milwaukee River at the Mouth and stream discharge at four Milwaukee River Watershed sites. [Menomonee River, Menomonee River at Wauwatosa; Kinnickinnic River, Kinnickinnic River at S. 11th Street at Milwaukee; lowess, lowess smoothing curve from 5 minute discharge data within a seiche–effected river channel; Lachno2, Lachnospiraceae human marker; Ruminant, *Bacteroides* Ruminant marker].

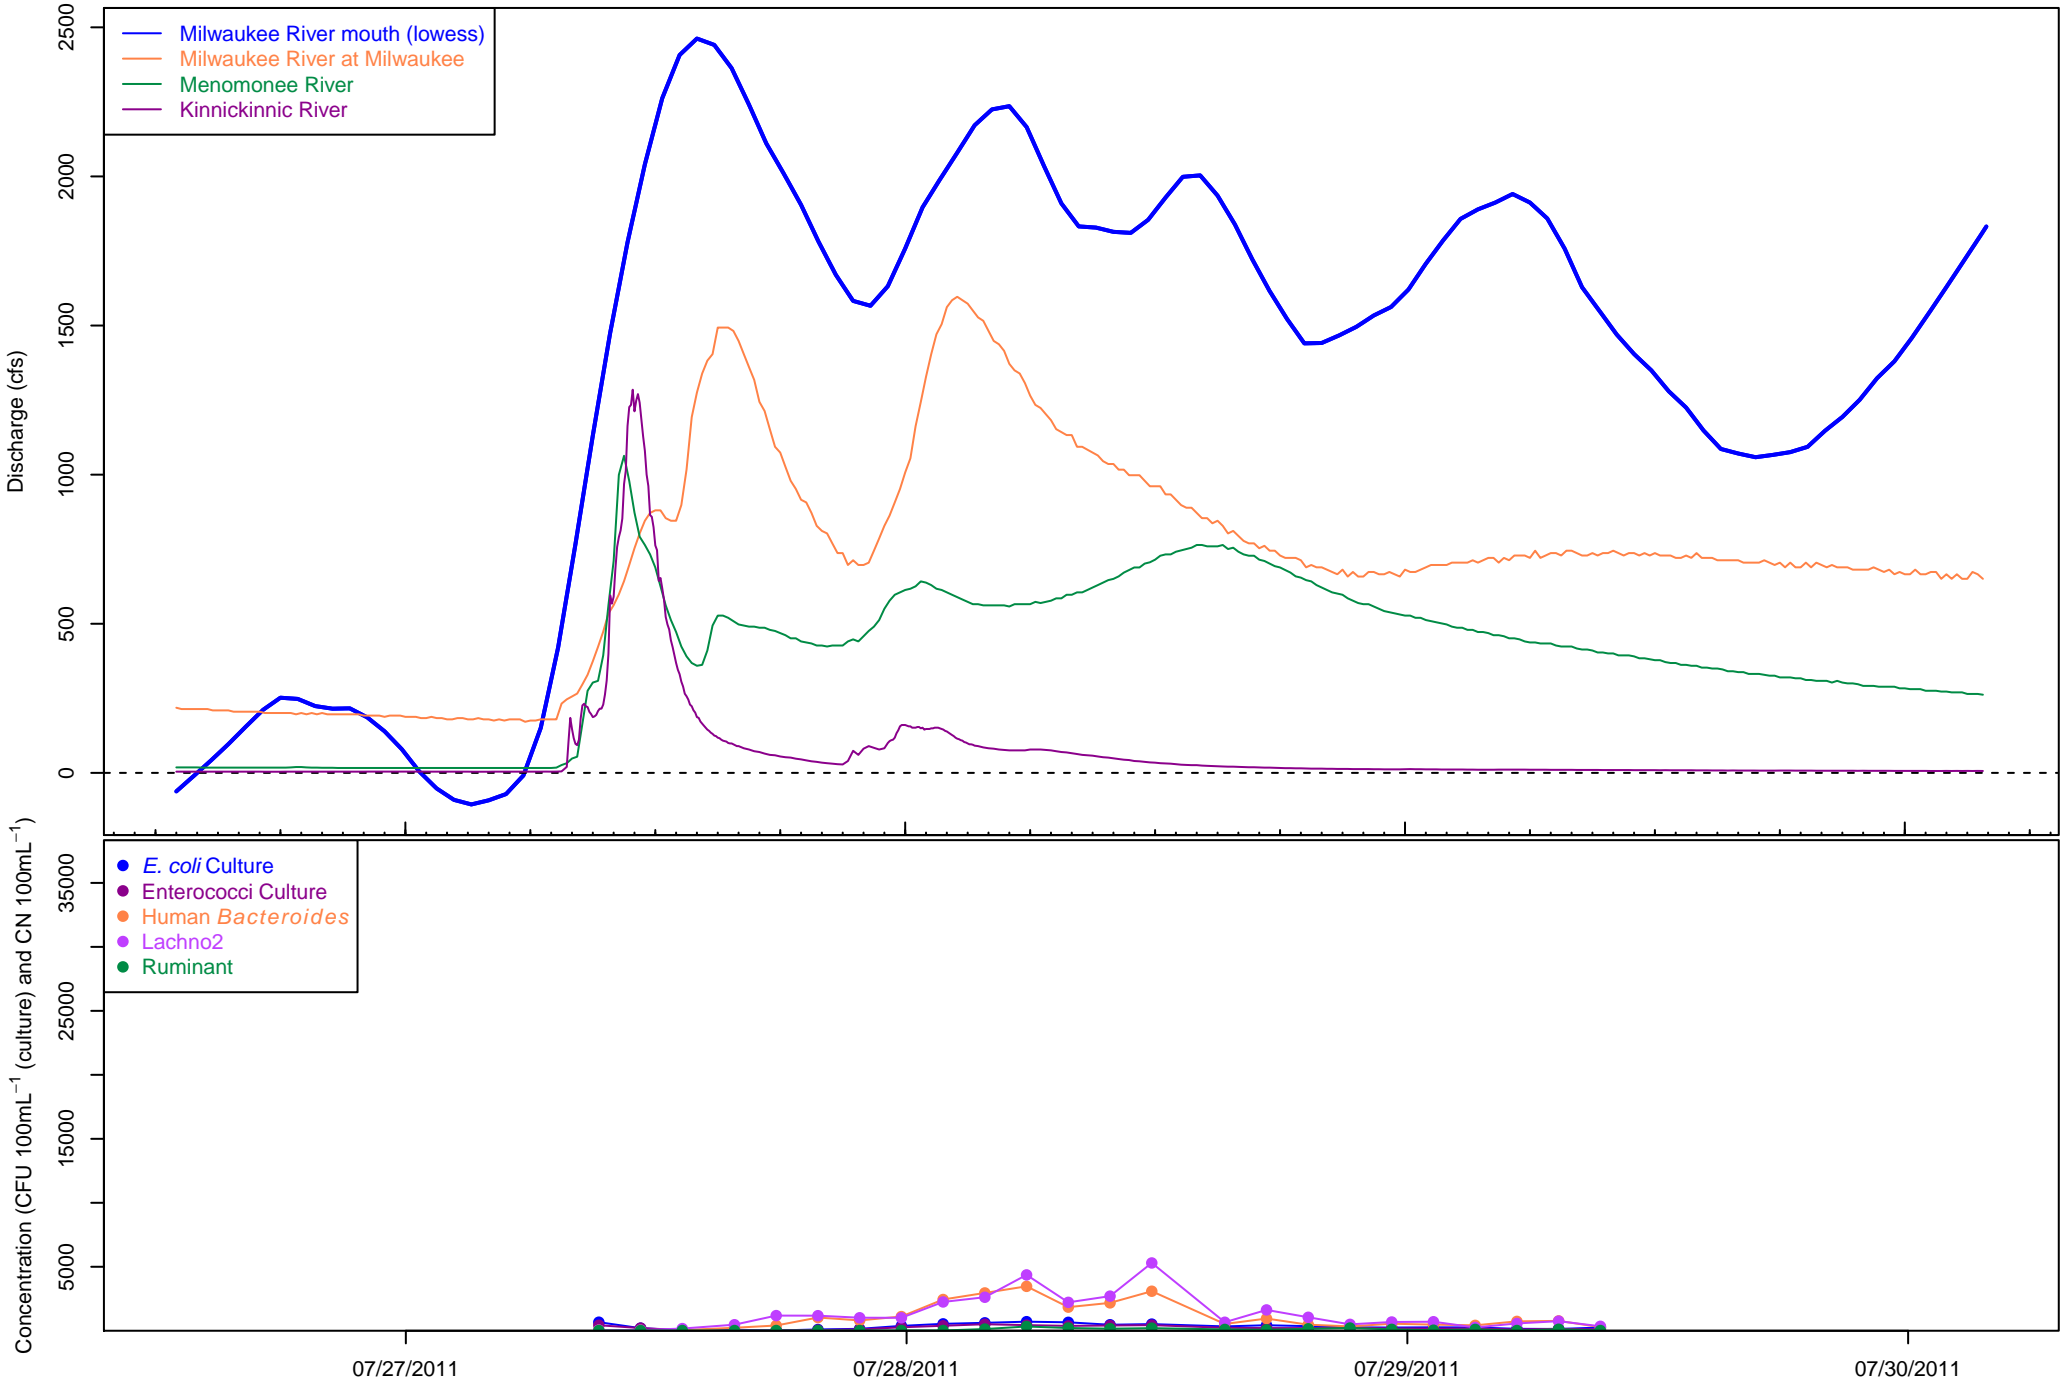

Figure S13. Fecal indicator bacteria at Milwaukee River at the Mouth and stream discharge at four Milwaukee River Watershed sites. [Menomonee River, Menomonee River at Wauwatosa; Kinnickinnic River, Kinnickinnic River at S. 11th Street at Milwaukee; lowess, lowess smoothing curve from 5 minute discharge data within a seiche–effected river channel; Lachno2, Lachnospiraceae human marker]

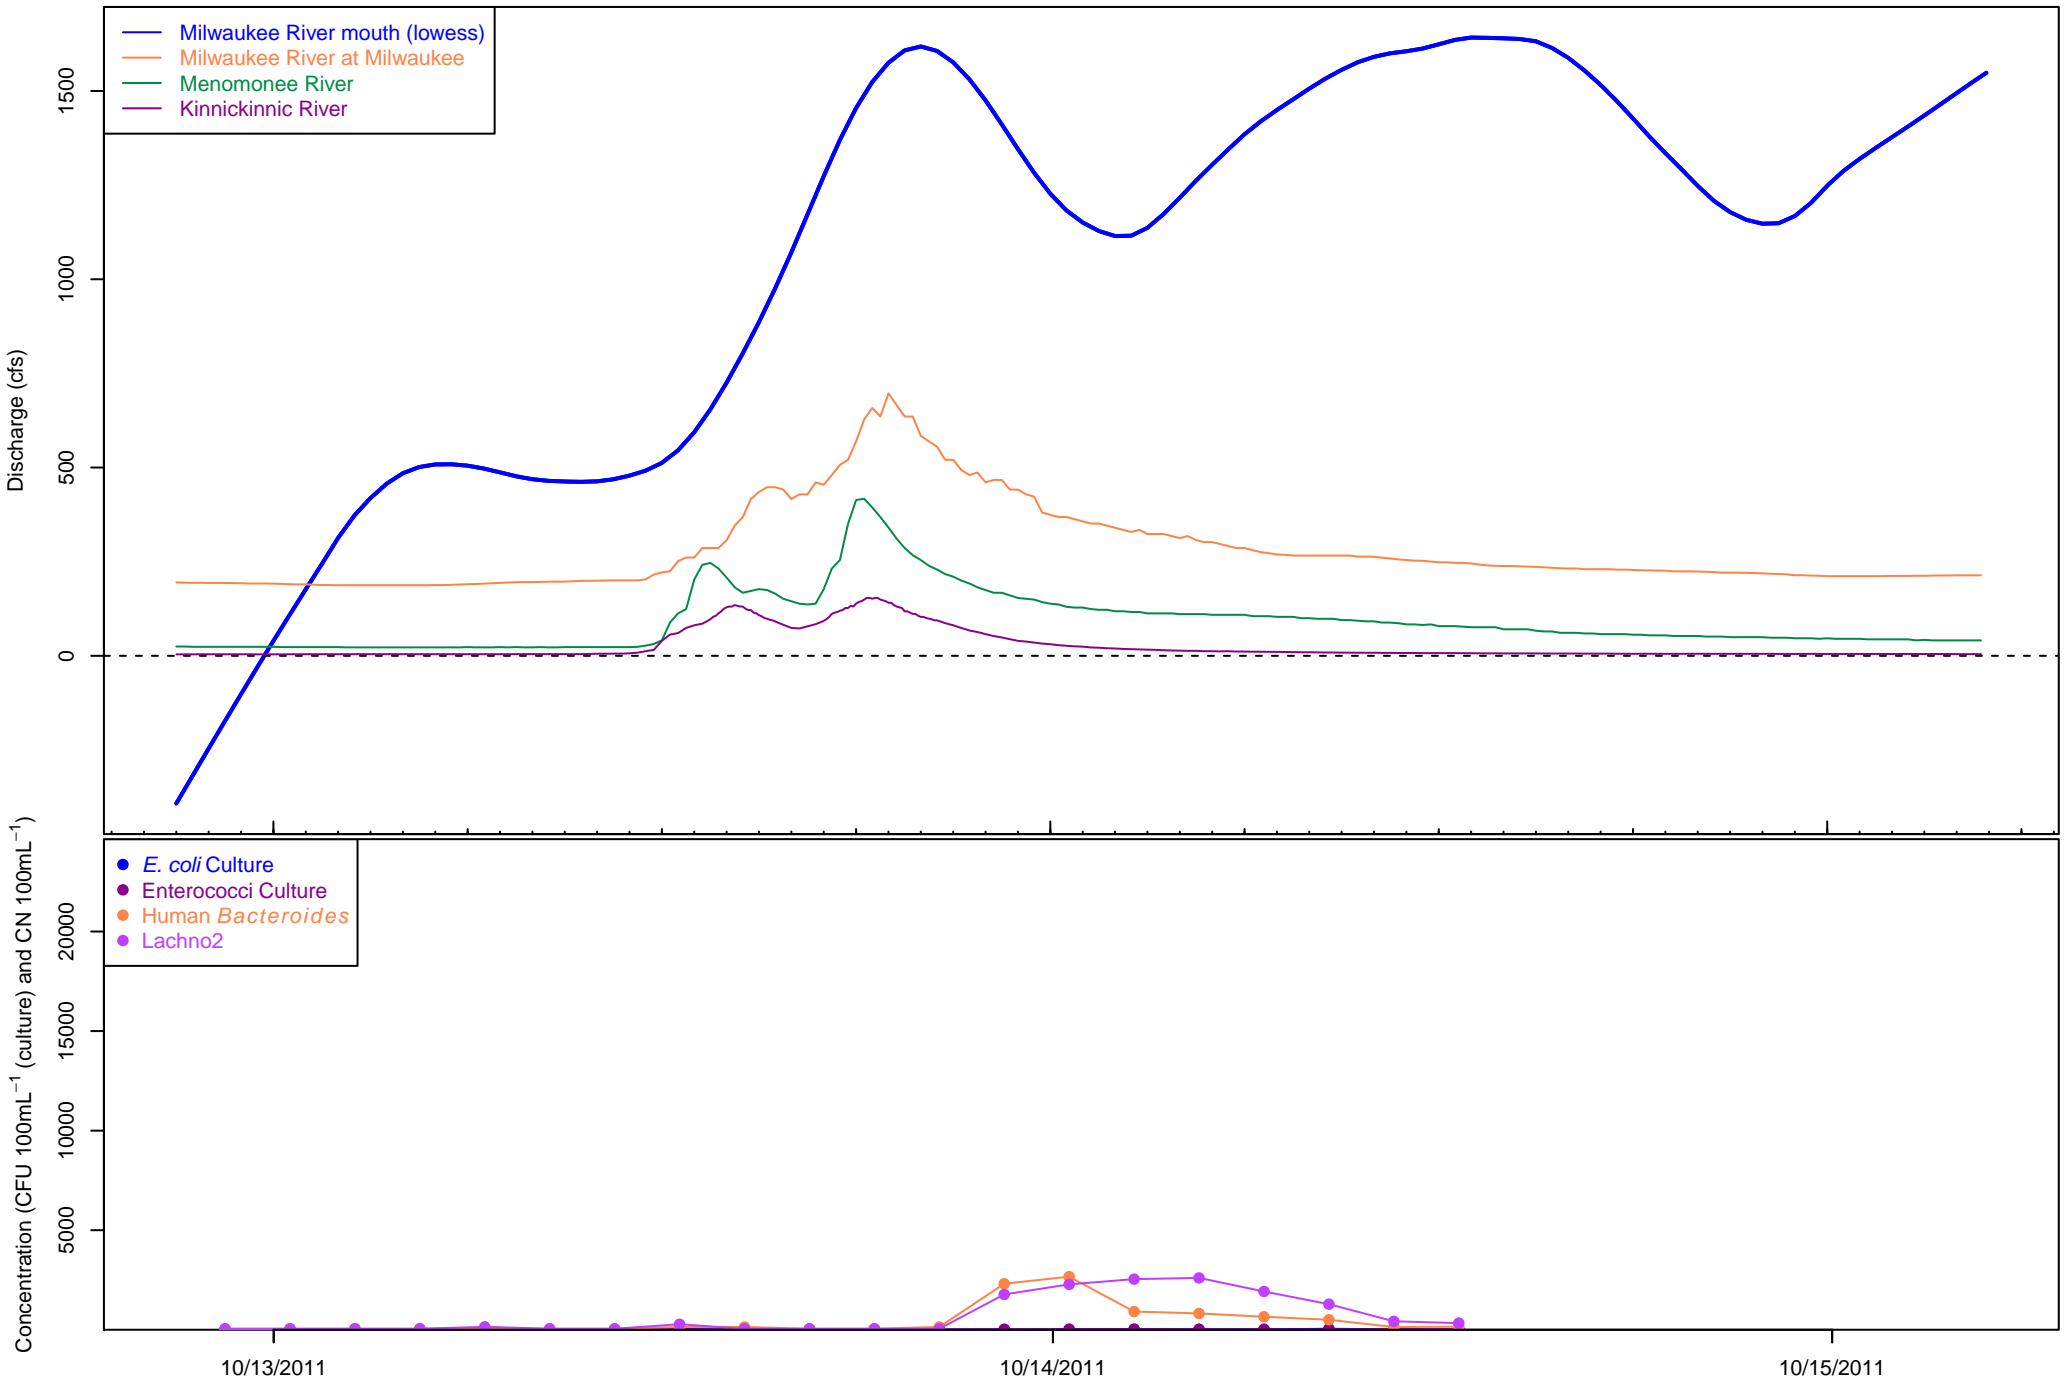

Supplement: NIHMS979489-supplement-Supplemental_Fig_S3-S13.pdf [file NIHMS979489-supplement-Supplemental_Fig_S3-S13.pdf]
