# Supplementary material for: Sewage loading and microbial risk in urban waters of the Great Lakes
Source: PubMed Central journal article supplement (PMC6211557; doi:10.1525/elementa.301), 2018-06-20
Supplement: NIHMS979489-supplement-Supplemental_Text_Tables_Fig_S1-S2.pdf [file NIHMS979489-supplement-Supplemental_Text_Tables_Fig_S1-S2.pdf]

## Supplemental material

### Sewage loading and microbial risk in urban waters of the Great Lakes

Sandra L. McLellan<sup>1\*</sup>, Elizabeth P. Sauer<sup>1</sup>, Steve R. Corsi<sup>2</sup>, Melinda J. Bootsma<sup>1</sup>, Alexandria B. Boehm<sup>3</sup>, Susan K. Spencer<sup>4</sup>, Mark A. Borchardt<sup>4</sup>

<sup>1</sup>School of Freshwater Sciences, University of Wisconsin-Milwaukee, Milwaukee, Wisconsin, <sup>2</sup>United States Geological Survey, Middleton Wisconsin. <sup>3</sup>Department of Civil Engineering, Stanford University, Palo Alto, California, and <sup>4</sup>United States Department of Agriculture – Agricultural Research Service, Marshfield, WI.

Corresponding authors email: [mclellan@uwm.edu](mailto:mclellan@uwm.edu)

Disclaimer: Any use of trade, firm, or product names is for descriptive purposes only and does not imply endorsement by the U.S. Government.

#### List of contents:

##### Text S1. Detection of norovirus

##### Table S1. Urban estuary samples collected under low-flow, rainfall, and rainfall with combined sewer overflows (CSOs)

##### Table S2. Traditional host-associated qPCR assay primers, standard curves, and references

##### Table 3S. Log<sub>10</sub> mean and standard deviation (in log space) of HB, Lachno2, and norovirus

**Figure S1. Box and whisker plots of risk of illness from norovirus given a concentration of HB in river water.** Analysis assumes that source of HB is raw sewage that is recent; i.e., 0–7 days. The red line shows the threshold illness level of 30/1000. The middle line in each box is the median probability of illness ( $P_{ill}$ ) from the 10,000 iterations of the model. The top and bottom of the boxes are the 75<sup>th</sup> and 25<sup>th</sup> percentiles, respectively. The top and bottom of each whisker are the 90<sup>th</sup> and 10<sup>th</sup> percentiles, respectively, of those distributions.

**Figure S2. Box and whisker plots of risk of illness from norovirus given a concentration of Lachno2 in river water.** Analysis assumes that source of Lachno2 is raw sewage that is recent; i.e., 0–7 days. The red line shows the threshold illness level of 30/1000. The middle line in each box is the median  $P_{ill}$  from the 10,000 iterations of the model. The top and bottom of the boxes are the 75<sup>th</sup> and 25<sup>th</sup> percentiles, respectively. The bottom and top of each whisker are the 90<sup>th</sup> and 10<sup>th</sup> percentiles, respectively, of those distributions.

## Supplemental Text S1. Detection of norovirus

For analysis of untreated wastewater treatment plant influent, a volume of 2 L was concentrated by standard polyethylene glycol flocculation methods (Lambertini et al., 2008). Final concentrated sample volumes, typically 2 to 4 mL, were stored at  $-20^{\circ}\text{C}$  until nucleic acid extraction. The QIAamp DNA blood mini kit and buffer AVL (Qiagen, Valencia, CA) were used to extract nucleic acids from these stored volumes.

Samples were analyzed by two-step reverse transcription (RT)-qPCR (RNA viruses) using SuperScript III (Life Technologies, Carlsbad, CA) and LightCycler 480 Probes Master kit (Roche Diagnostics, Mannheim, Germany). The RT qPCR procedures are described in detail by Borchardt et al. (2012). Primers targeting GI norovirus (Jothikumar et al., 2005) and GII norovirus (Kageyama et al., 2003) have been described previously. Primer (IDT, Coralville, IA) and hydrolysis probe (TIB Molbio, Berlin, Germany) concentrations were 250 nM and 50 nM, respectively. Efficiencies for GI norovirus ranged from 0.924 to 1.066 with an average  $R^2$  of 0.990. All samples were tested for RT and PCR inhibition following the method of Gibson et al. (2012). No-template controls (i.e., negative controls) for the RT, PCR, and extraction steps were negative. The qPCR standard curves were generated from archived stocks (cultures or human stool specimens) of each norovirus type. Standards were prepared and enumerated following the methods described in the Supplemental Material of Borchardt et al. (2012).

The 95% limit of detection (95% LOD) has been estimated for adenovirus and enterovirus previously, although the filtration step during LOD estimation used dead-end ultrafiltration instead of glass wool filtration. The 95% LODs were 1.5 and 4.0 gene copies  $\text{L}^{-1}$ , respectively (Stokdyk et al., 2016). These LODs are for the full analytical process including losses from filter elution, secondary concentration, and nucleic acid extraction. As the 95% LOD gives the lowest concentration at which there is a 95% probability of detection, concentrations reported below it are less likely to be detected but are, nonetheless, true positives.

## References for Text S1

- Borchardt MA, Spencer SK, Kieke BA, Lambertini E, Loge FJ. 2012. Viruses in nondisinfected drinking water from municipal wells and community incidence of acute gastrointestinal illness. *Environ Health Perspect* **120**(9): 1272–1279.
- Gibson KE, Schwab KJ, Spencer SK, Borchardt MA. 2012. Measuring and mitigating inhibition during quantitative real time PCR analysis of viral nucleic acid extracts from large-volume environmental water samples. *Water Res* **46**(13): 4281–4291.
- Jothikumar N, Lowther JA, Henshilwood K, Lees DN, Hill VR, et al. 2005. Rapid and sensitive detection of noroviruses by using TaqMan-based one-step reverse transcription-PCR assays and application to naturally contaminated shellfish samples. *Appl Environ Microbiol* **71**(4): 1870–1875.

- Kageyama T, Kojima S, Shinohara M, Uchida K, Fukushi S, et al. 2003. Broadly reactive and highly sensitive assay for Norwalk-like viruses based on real-time quantitative reverse transcription-PCR. *J Clinical Microbiol* **41**(4): 1548–1557.
- Lambertini E, Spencer SK, Bertz PD, Loge FJ, Kieke BA, et al. 2008. Concentration of enteroviruses, adenoviruses, and noroviruses from drinking water by use of glass wool filters. *Applied Environ Microbiol* **74**(10): 2990–2996.
- Stokdyk JP, Firnstahl AD, Spencer SK, Burch TR, Borchardt MA. 2016. Determining the 95% limit of detection for waterborne pathogen analyses from primary concentration to qPCR. *Water Res* **96**: 105–113.

**Table S1. Urban estuary samples collected under low-flow, rainfall, and rainfall with combined sewer overflows (CSOs)**

| <b>Start date</b> | <b>End date</b> | <b>Event type</b> | <b>Number of samples</b> | <b>Number of samples analyzed using qPCR</b> | <b>Composite type for qPCR analysis</b> |
|-------------------|-----------------|-------------------|--------------------------|----------------------------------------------|-----------------------------------------|
| 8 June 2009       | 11 June 2009    | Rain              | 69                       | 22                                           | 1-h sample                              |
| 16 June 2009      | 18 June 2009    | Baseflow          | 48                       | 5                                            | 1-h sample                              |
| 19 June 2009      | 22 June 2009    | CSO               | 75                       | 32                                           | 1-h sample                              |
| 22 October 2009   | 25 October 2009 | Rain              | 58                       | 28                                           | 1-h sample                              |
| 5 April 2010      | 8 April 2010    | Rain              | 16                       | 16                                           | 4-h composite                           |
| 23 April 2010     | 26 April 2010   | Rain              | 15                       | 15                                           | 4-h composite                           |
| 10 May 2010       | 14 May 2010     | Rain              | 23                       | 23                                           | 4-h composite                           |
| 18 May 2010       | 19 May 2010     | Baseflow          | 5                        | 5                                            | 4-h composite                           |
| 23 July 2010      | 27 July 2010    | CSO               | 11                       | 24                                           | 4-h composite                           |
| 20 June 2011      | 24 June 2011    | CSO               | 48                       | 31                                           | 2-h composite                           |
| 25 July 2011      | 26 July 2011    | Baseflow          | 12                       | 5                                            | 2-h composite                           |
| 27 July 2011      | 29 July 2011    | Rain              | 36                       | 24                                           | 2-h composite                           |
| 12 October 2011   | 14 October 2011 | Rain              | 24                       | 24                                           | 2-h composite                           |
| <b>TOTAL</b>      |                 |                   | <b>476</b>               | <b>254</b>                                   |                                         |

**Table S2. Traditional host-associated qPCR assay primers, standard curves, and references**

| Assay, target, references                                                                                                                                  | Primers                             | Sequence                                                                                                                          | Slope and y intercept | Efficiency |
|------------------------------------------------------------------------------------------------------------------------------------------------------------|-------------------------------------|-----------------------------------------------------------------------------------------------------------------------------------|-----------------------|------------|
| <i>E. coli</i> ,<br><i>uidA</i> gene,<br>Li et al. (2006)                                                                                                  | uidA1663F<br>uidA1790R<br>uidA1729p | 5'GCG ACC TCG CAA GGC ATA3'<br>5'GAT TCA TTG TTT GCC TCC CTG CTG CG3'<br>5'[6FAM]-<br>TGCAGCAGAAAAGCCGCCGACTTCGG [MGB-<br>NFQ] 3' | -3.34, 38.69          | 99.41      |
| Enterococci, 23S rRNA gene,<br>USEPA (2012)                                                                                                                | Entero1F-G<br>Entero2R<br>Enterop   | 5'GAG AAA TTC CAA ACG AAC TTG3'<br>5'CAG TGC TCT ACC TCC ATC ATT3'<br>5'[6FAM]-<br>TGGTTCTCTCCGAAATAGCTTTAGGGCTA[<br>MGB-NFQ] 3'  | -3.37, 39.55          | 98.13      |
| HB,<br>16S rRNA gene of human<br><i>Bacteroides</i> ,<br>Templar et al. (2016), modified<br>from Bernhard and Field<br>(2000) and<br>Kildare et al. (2007) | HF183F<br>HF241R<br>HF193p          | 5'ATC ATG AGT TCA CAT GTC CG3'<br>5'CGT TAC CCC GCC TAC TAT CTA ATG3'<br>5'[6FAM]-TCC GGT AGA CGA TGG GGA TGC<br>GTT [MGB-NFQ] 3' | -3.30, 37.72          | 100.85     |
| Lachno2,<br>human <i>Lachnospiraceae</i><br>(genus <i>Blautia</i> ),<br>Newton et al. (2011)                                                               | Lachno2-F<br>Lachno2-R<br>Lachno2p  | 5'TTCGCAAGAATGAAACTCAAAG3'<br>5'AAGGAAAGATCCGGTTAAGGATC3'<br>5'[6FAM]-ACCAAGTCTTGACATCCG [MGB-<br>NFQ] 3'                         | -3.38, 37.37          | 97.76      |
| Ruminant-specific<br><i>Bacteroidetes</i> ,<br>Reischer et al. (2006)                                                                                      | RumBacR_f<br>RumBacR_r<br>RumBacR_p | 5'GCG TAT CCA ACC TTC CCG3'<br>5'CAT CCC CAT CCG TTAC CG3'<br>5'[6FAM]-CTT CCG AAA GGG AGA TT [MGB-<br>NFQ]3'                     | -3.51, 40.97          | 92.82      |

## References for Table 2S

- Bernhard AE, Field KG. 2000. A PCR assay to discriminate human and ruminant feces on the basis of host differences in *Bacteroides-Prevotella* genes encoding 16S rRNA. *Appl Environ Microbiol* **66**:4571–4574.
- Kildare BJ, Leutenegger CM, McSwain BS, Bambic DG, Rajal VB, Wuertz S. 2007. 16S rRNA-based assays for quantitative detection of universal, human-, cow-, and dog-specific fecal *Bacteroidales*: A Bayesian approach. *Water Res* **41**:3701–3715.
- Li J, McLellan SL, Ogawa S. 2006. Accumulation and fate of green fluorescent labeled *Escherichia coli* in laboratory-scale drinking water biofilters. *Water Res* **40**:3023–3028.
- Newton RJ, Vandewalle JL, Borchardt MA, Gorelick MH, McLellan SL, 2011. *Lachnospiraceae* and *Bacteroidales* alternative fecal indicators reveal chronic human sewage contamination in an urban harbor. *Appl Environ Microbiol* **77**:6972–6981.
- Reischer G, Kasper DC, Steinborn R, Mach RL, Farnleitner AH. 2006. Quantitative PCR method for sensitive detection of ruminant pollution in freshwater and evaluation of this method in alpine karstic regions. *Appl Environ Microbiol* **8**:5610–5614.
- Templar HA, Dila DK, Bootsma MJ, Corsi SR, McLellan SL. 2016. Quantification of human-associated fecal indicators reveal sewage from urban watersheds as a source of pollution to Lake Michigan. *Water Res* **100**:556–567.
- USEPA. 2012. Method 1611: Enterococci in water by TaqMan® quantitative polymerase chain reaction (qPCR) assay. Office of Water, Washington, DC. EPA-821-R-12-008.

**Table 3S. Log<sub>10</sub> mean and associated standard deviation (in log space) of HB, Lachno2, and norovirus**

| <u>Target</u>                   | <u>log<sub>10</sub> mean<sup>a</sup></u> | <u>SD of log<sub>10</sub>-transformed values</u> |
|---------------------------------|------------------------------------------|--------------------------------------------------|
| HB (CN L <sup>-1</sup> )        | 8.442                                    | 0.2403                                           |
| Lachno2 (CN L <sup>-1</sup> )   | 8.774                                    | 0.2325                                           |
| Norovirus (GC L <sup>-1</sup> ) | 4.502                                    | 0.7535                                           |

<sup>a</sup>Units are log<sub>10</sub> (copies per liter). Only positive values were used for determining the norovirus distribution of QMRA. A Lilliefors test of normality indicates that HB, Lachno2, and norovirus distributions were log-normal at  $\alpha = 0.1$ .

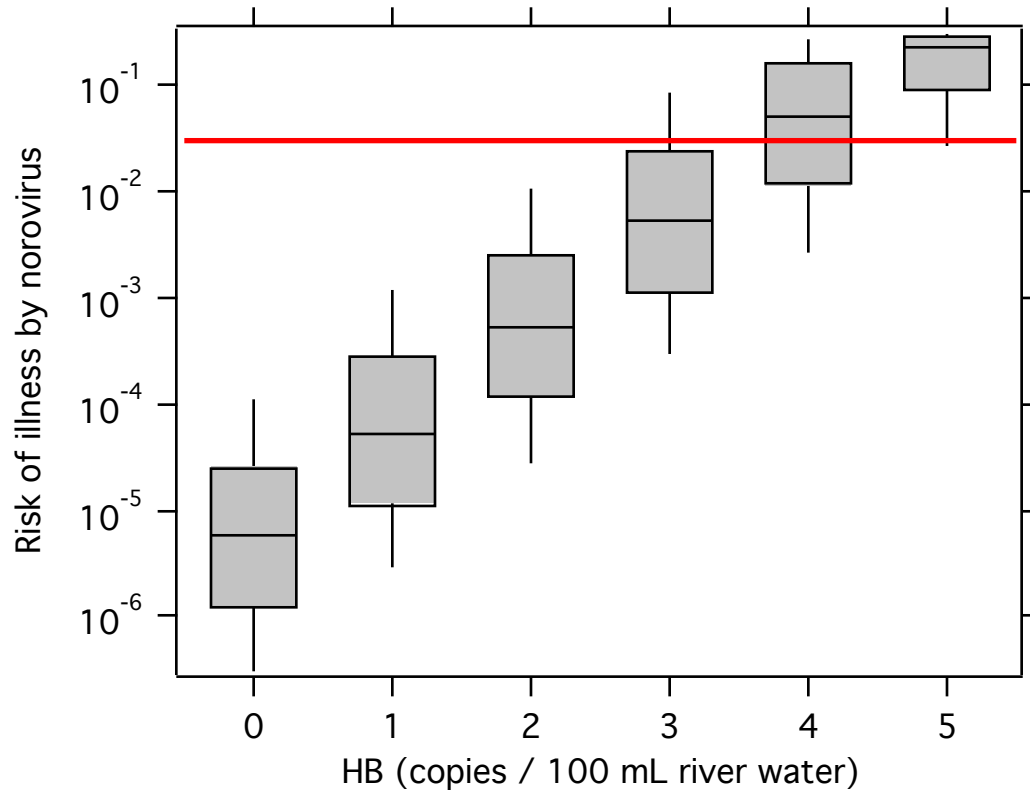

**Figure S1. Box and whisker plots of risk of illness from norovirus given a concentration of HB in river water.** Analysis assumes that source of HB is raw sewage that is recent; i.e., 0–7 days. The red line shows the threshold illness level of 30/1000. The middle line in each box is the median probability of illness ( $P_{ill}$ ) from the 10,000 iterations of the model. The top and bottom of the boxes are the 75<sup>th</sup> and 25<sup>th</sup> percentiles, respectively. The top and bottom of each whisker are the 90<sup>th</sup> and 10<sup>th</sup> percentiles, respectively, of those distributions.



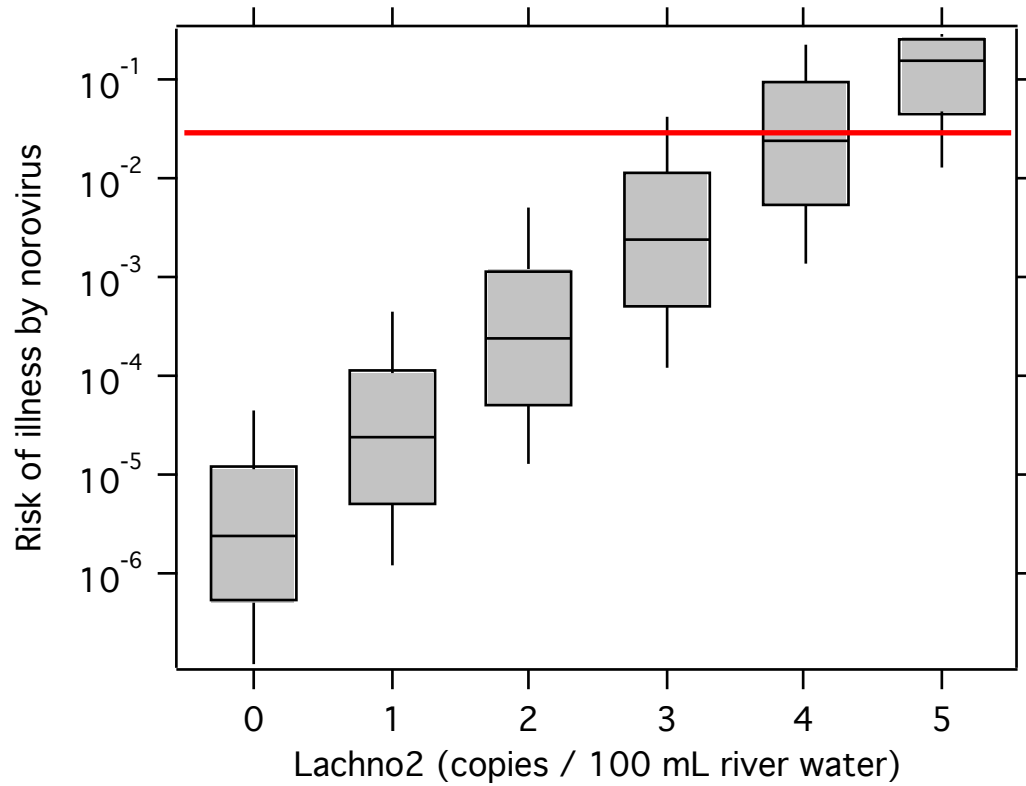

**Figure S2. Box and whisker plots of risk of illness from norovirus given a concentration of Lachno2 in river water.** Analysis assumes that source of Lachno2 is raw sewage that is recent; i.e., 0–7 days. The red line shows the threshold illness level of 30/1000. The middle line in each box is the median  $P_{ill}$  from the 10,000 iterations of the model. The top and bottom of the boxes are the 75<sup>th</sup> and 25<sup>th</sup> percentiles, respectively. The bottom and top of each whisker are the 90<sup>th</sup> and 10<sup>th</sup> percentiles, respectively, of those distributions.
